1 **Age-Associated B cells predict impaired humoral immunity after COVID-19**  
2 **vaccination in patients receiving immune checkpoint blockade**

3  
4 Juan Carlos Yam-Puc<sup>1†\*</sup>, Zhaleh Hosseini<sup>1†</sup>, Emily C. Horner<sup>1†</sup>, Pehuén Pereyra  
5 Gerber<sup>2,3†</sup>, Nonantzin Beristain-Covarrubias<sup>1†</sup>, Robert Hughes<sup>1†</sup>, Maria Rust<sup>1</sup>, Rebecca H.  
6 Boston<sup>1</sup>, Magda Ali<sup>1</sup>, Edward Simmons-Rosello<sup>1</sup>, Martin O'Reilly<sup>1</sup>, Harry Robson<sup>1</sup>, Lucy H.  
7 Booth<sup>1</sup>, Lakmini Kahanawita<sup>1</sup>, Sofia Grigoriadou<sup>4</sup>, Andrea Correa-Noguera<sup>5</sup>, Lourdes Ceron-  
8 Gutierrez<sup>5</sup>, Thomas Mulroney<sup>1</sup>, Aleksei Lulla<sup>6</sup>, Katrin Fischer<sup>6</sup>, Andrew Craxton<sup>1</sup>, Georgina  
9 S.F. Anderson<sup>1</sup>, Xiao-Ming Sun<sup>1</sup>, Anne Elmer<sup>7</sup>, Caroline Saunders<sup>7</sup>, Areti Bermperi<sup>7</sup>, Sherly  
10 Jose<sup>7</sup>, Mike Chapman<sup>1</sup>, Marion MacFarlane<sup>1</sup>, Anne E. Willis<sup>1</sup>, Kiran R. Patil<sup>1</sup>, Florian  
11 Hollfelder<sup>6</sup>, Marko Hyvönen<sup>6</sup>, CITIID-NIHR COVID-19 BioResource Collaboration, Sarah  
12 Spencer<sup>1</sup>, Emily Staples<sup>1</sup>, Matthew S. Buckland<sup>4,5</sup>, Rainer Döffinger<sup>8</sup>, Christine Parkinson<sup>8§</sup>,  
13 Sara Lear<sup>8§</sup>, Nicholas J. Matheson<sup>2,3,8,9§</sup>, James E. D. Thaventhiran<sup>1,2,8§\*</sup>.

14  
15 <sup>1</sup> Medical Research Council Toxicology Unit, School of Biological Sciences, University of  
16 Cambridge, Cambridge, UK.

17 <sup>2</sup> Cambridge Institute of Therapeutic Immunology and Infectious Disease (CITIID), University  
18 of Cambridge, UK

19 <sup>3</sup> Department of Medicine, University of Cambridge, Cambridge, UK

20 <sup>4</sup> Department of Clinical Immunology, Barts Health, London, UK.

21 <sup>5</sup> UCL GOSH Institute of Child Health Division of Infection and Immunity, Section of Cellular  
22 and Molecular Immunology, London, UK.

23 <sup>6</sup> Department of Biochemistry, University of Cambridge, Cambridge, UK

24 <sup>7</sup> NIHR Cambridge Clinical Research Facility

25 <sup>8</sup> Cambridge University NHS Hospitals Foundation Trust, Cambridge, UK

26 <sup>9</sup> NHS Blood and Transplant, Cambridge, UK

27  
28 † These authors contributed equally

29 § These authors contributed equally

30 \* Corresponding authors: [jedt2@cam.ac.uk](mailto:jedt2@cam.ac.uk), [jcy28@cam.ac.uk](mailto:jcy28@cam.ac.uk).

31  
32 Key words: Inborn error of immunity (IEI), immune-checkpoint blockade, neutralising  
33 antibodies, antigen-specific memory B cells, BNT162b2 vaccine, immunodeficiency, cancer

34  
35 The authors declare no potential conflicts of interest.

37 **Abstract**

38 The effect of immune checkpoint blockade on COVID-19 immunity is unclear. In this study,  
39 we determine whether immune checkpoint blockade expanded age-associated B cells  
40 (ABCs) are similar to those present in other conditions, and whether they enhance or detract  
41 from the COVID-19 vaccine responses. First, we use single cell RNA sequencing  
42 (scRNAseq) to show that ABCs arising from distinct aetiologies have common transcriptional  
43 profiles and may be further subdivided according to expression of genes associated with  
44 different immune functions, including the autoimmune regulator (AIRE). Next, we perform  
45 detailed longitudinal profiling of the COVID-19 vaccination response in patients. Finally, we  
46 show that high pre-vaccination ABC frequency correlates with decreased levels of antigen-  
47 specific memory B cells, and reduced magnitude and longevity of neutralising capacity  
48 against authentic SARS-CoV-2 virus. Expansion of ABCs is a biomarker for individuals with  
49 cancer requiring additional or more frequent booster immunisation against COVID-19.

50

## 51 **Introduction**

52 Despite the success of mRNA-lipid nanoparticle (mRNA-LNP) COVID-19 vaccines in  
53 reducing the risk of symptomatic infection, hospitalisation, and death(1,2), vaccinated  
54 patients with cancer remain at increased risk of severe outcomes following SARS-CoV-2  
55 infection(3). A cancer therapy that observational studies(4-6) suggests could improve  
56 vaccine efficacy is immune checkpoint blockade (ICB). By targeting PD-1 and CTLA-4  
57 checkpoints, ICB non-specifically promotes T cell responses, including those involved in  
58 anti-viral and anti-cancer immunity. Furthermore, preclinical evidence indicates immune  
59 checkpoint blockade can, via T and B cell interactions, enhance antibody responses(7,8).  
60 The neutralising antibodies produced by the humoral response are a vital component of  
61 vaccine protection as they inhibit viral replication *in vitro* and correlate with protection against  
62 infection *in vivo*(9-11). However, complicating the positive potential of ICB for vaccine  
63 enhancement, ICB induces the expansion of a B cell subset termed in other contexts Age-  
64 Associated B cells (ABCs)(12), which may have a confounding effect on humoral vaccine  
65 responses.

66

67 ABCs comprise a naturally occurring population of antigen-experienced B cells which  
68 expands continuously with age in healthy individuals but accumulates prematurely in people  
69 with certain immune dyscrasias, autoimmunity, and/or infectious diseases(13). They have  
70 also been termed CD11c<sup>+</sup> B cells, CD11c<sup>+</sup>T-bet<sup>+</sup> B cells, double negative 2 (DN2) B cells or  
71 atypical memory B cells(13-17), and may additionally be generated by external  
72 challenges(18,19), including COVID-19 infection and vaccination(20). Although ABCs are  
73 associated with disease in autoimmunity, their role in vaccine immunity is uncertain. In mice,  
74 these cells are required for optimal antibody responses following influenza vaccination(21),  
75 possibly due to enhanced ability to present antigens to T cells relative to follicular B  
76 cells(16,22). In patients with cancer treated with ICB, the expansion of ABCs precedes the  
77 development of both antibody-mediated and non-antibody-mediated autoimmunity(12). This  
78 is in keeping with their role in promoting antibody responses. However, we and others have  
79 shown that expansion of ABCs is associated with antibody deficiency in specific cohorts of  
80 patients with inborn errors of immunity (IEI)(23-26). These include patients with *NFKB1*  
81 haploinsufficiency, in whom the genetic lesion leads predominantly to B cell-intrinsic  
82 immunodeficiency(26), and patients with *CTLA4* haploinsufficiency, in whom the genetic-  
83 lesion leads predominantly to a B cell-extrinsic functional T cell deficit (24,27). These  
84 observations suggest two key questions: are the ABCs found in patients treated with ICB  
85 equivalent to those found in other settings? And do these cells, when expanded through  
86 distinct mechanisms, have a positive or negative effect on humoral vaccine responses?

87

88 The increase in patients with cancer eligible to receive ICB treatment(28) and the survival  
89 benefit conferred by ICB treatment means that optimally protecting patients with cancer who  
90 are receiving these therapies from infection will be an increasing priority. Here, we answer  
91 the above questions regarding the characteristics and activity of ABCs in different patient  
92 groups as well as developing an understanding of the crosstalk between ICB and successful  
93 vaccination.

94

## 95 **Results**

### 96 **ABCs arising from distinct aetiologies have common transcriptional profiles**

97 We first assessed the similarities between ABCs from patients with different causes for ABC  
98 expansion, using single cell RNA sequencing (scRNAseq). This included B cells from  
99 healthy controls (HC, n=8), patients with cancer treated with ICB (ICB, n=8) and patients  
100 with *NFKB1* or *CTLA4* haploinsufficiency (IEI, n=4), together with a published set of single B  
101 cell transcriptomes from patients with SLE (n=3)(29). By focussing on patients with rare,  
102 monogenic defects leading to well-characterised IEI, we were able to ensure that contrasting  
103 B cell intrinsic (*NFKB1*) and extrinsic (*CTLA4*) aetiologies were included. Unsupervised  
104 clustering of the 52,402 B cells, displayed in a uniform manifold approximation and  
105 projection (UMAP) visualisation, revealed six clusters (**Fig. 1a-c**). Using CITE-seq, we  
106 identified ABCs that had low CD21 and high CD11c surface protein expression, in keeping  
107 with the definitions used in previous flow cytometry-based studies(12,26,30) (Supplementary  
108 **Fig. 1a-b**). Cells were dispersed across all clusters regardless of the patient group or sex  
109 from which they originated (**Fig. 1b-d**). ABC frequencies were higher in all patient groups  
110 compared to healthy controls (**Fig. 1d**).

111

### 112 **Distinct subsets of ABCs express genes associated with distinct immune function**

113 The clustering and marker gene expression suggested that the ABC population can be  
114 subdivided into “Classical ABCs”, “Anergic ABCs” and “CD1c ABCs” (**Fig. 1e**). Classical  
115 ABC frequencies were higher in females and patients with SLE (**Fig. 1b-d** and  
116 Supplementary **Fig. 1c-e**). ABCs have been described as “anergic B cells” (31,32),  
117 interestingly, anergic ABCs (expressing canonical genes associated with anergy, such as  
118 *EGR1* and *NR4A1*) clustered separately from Classical ABCs (**Fig. 1a and Fig. 1e** and  
119 **Supplementary Table 1**), indicating heterogeneity within ABCs for this phenotype. Indeed,  
120 many of the most differentially expressed genes in Classical ABCs were associated with  
121 MHC class II-restricted antigen presentation (**Fig. 1f**). Gene ontology enrichment analysis  
122 demonstrated selective upregulation of biological processes associated with professional

123 antigen presentation, such as antigen uptake, processing, class II presentation, and co-  
124 stimulation (**Fig. 1g** and **Supplementary Table 2**). This was specific for MHC class-II-  
125 restricted antigen presentation, as genes required for MHC class I-restricted antigen  
126 presentation were instead differentially expressed in CD1c ABCs, relative to Classical ABCs  
127 (Supplementary **Fig. 2**). This supports the functional separation of these two clusters, which  
128 were less distinct on UMAP visualisation (**Fig. 1a**).

129

### 130 **Upregulation of AIRE and its target genes is seen in Classical ABCs**

131 We confirmed MHC-II antigen presentation related genes were amongst the most  
132 differentially expressed genes of Classical ABCs (**Fig. 2a** and **Supplementary Table 3**).  
133 Surprisingly, this analysis revealed the Autoimmune Regulator (AIRE) to be significantly  
134 upregulated in Classical ABCs from all subject cohorts (**Fig. 2a-b**, Supplementary **Fig. 3**).  
135 AIRE-expressing B lymphocytes were also in other clusters, albeit at a much lower  
136 frequency (**Fig. 2c**). This is consistent with the accumulation of AIRE-expressing B cells in  
137 the Classical ABC differentiation state during peripheral B cell development, rather than  
138 selective upregulation of AIRE after ABC differentiation. Expression of a single gene in  
139 3.85% of cells will make a negligible contribution to the UMAP clustering, therefore  
140 enrichment of AIRE-expressing cells within the apex of the Classical ABC cluster  
141 (Supplementary **Fig. 3a**) further supports the biological association of AIRE expression and  
142 ABC differentiation. AIRE is a transcriptional regulator expressed in both the thymic  
143 epithelium and thymic B cells(33,34), which increases expression of tissue-restricted  
144 antigens (TRAs). TRA expression in the thymus is a central tolerance mechanism, whereby  
145 stimulation of developing T cells by antigens usually expressed in non-thymic tissues directs  
146 these cells away from fates with the potential for harmful self-antigen driven autoimmune  
147 responses. Previous reports have suggested that AIRE is not functional in the small  
148 proportion of peripheral lymphocytes in which it can be detected(35-37), although AIRE  
149 function has never been assessed in ABCs (a peripheral B cell subset specifically  
150 associated with autoimmune disease(16,38,39)). AIRE-expressing cells also upregulated a  
151 set of genes previously defined as AIRE targets in thymic B cells(34) (**Fig. 2d** and  
152 Supplementary **Fig. 3**). In addition, Classical ABCs upregulated HLA-G (Supplementary **Fig.**  
153 **2**), a non-classical class I HLA molecule transactivated by AIRE in thymic epithelial cells(40).  
154 Taken together, these data provide functional evidence of AIRE expression in Classical  
155 ABCs. Further work will be necessary to evaluate if AIRE expression in ABCs leads to self-  
156 antigen expression and productive presentation that can initiate autoimmune responses.

157

### 158 **ABC frequency predicts neutralising antibody response to COVID-19 vaccination**

159 To investigate the impact of ABCs on mRNA-LNP vaccination, we next analysed the  
160 immune response to the mRNA BNT162b2 COVID-19 vaccine in patients with variable  
161 expansion of ABCs, including healthy controls (HC, n=10), patients with cancer treated with  
162 ICB (ICB, n=19) and patients with *NFKB1* or *CTLA4* haploinsufficiency (IEI, n=9) (**Fig. 3a**  
163 and **Supplementary Table 4**). All subjects were invited for blood sampling prior to their  
164 second vaccine dose (day 0), then at early (day 8), mid (day 21) and late (day 105) time  
165 points after this dose (**Fig. 3a**). Classical ABC frequencies prior to vaccination (day 0) were  
166 determined by multicolour flow cytometry staining for CD11c and CD21 (Supplementary **Fig.**  
167 **4a**) and found to be elevated in patients compared with healthy controls (**Fig. 3b-c**).

168

169 Serum reactivity against SARS-CoV-2 spike (S), receptor-binding domain (RBD) and  
170 nucleocapsid (NCP) antigens was evaluated at day 21 after the second dose in the  
171 diagnostic immunology laboratory. The majority of patients (18/19 ICB, 5/8 IEI) generated  
172 IgG antibodies against S and RBD antigens (encoded by BNT162b2) at levels similar to the  
173 healthy control group (Supplementary **Fig. 4b**). These responses were unlikely to reflect  
174 previous natural infection with SARS-CoV-2, as patients did not have evidence of NCP  
175 reactivity (not encoded by BNT162b2) (Supplementary **Fig. 4b**). The quality of the COVID-  
176 19-specific antibody response can be determined by measuring the capacity of serum to  
177 neutralise authentic SARS-CoV-2 virus(41). Overall, most subjects displayed a rapid  
178 increase in neutralising antibody titres, peaking early (day 8) after their second vaccine dose  
179 (**Fig. 3d** and Supplementary **Fig. 4c**). By contrast, 5 patients (4 IEI and 1 ICB) failed to  
180 develop detectable neutralising capacity at any time point, despite having detectable anti-S  
181 antibodies. These patients are at greater risk of infection with SARS-CoV-2 and may be  
182 susceptible to prolonged or refractory COVID-19(42,43).

183

184 Critically, the frequency of pre-vaccine ABCs was inversely correlated with neutralising  
185 antibody titre at all timepoints (**Fig. 3e**), suggesting that ABCs predict both peak neutralising  
186 capacity after vaccination, and the longevity of the neutralising antibody response. Indeed, at  
187 day 105, 4/8 patients with IEI and 8/16 patients treated with ICB had neutralising antibody  
188 titres which had fallen below the highest titre observed at day 0, compared with 0/7 HCs  
189 (**Fig. 3d**). Individuals with neutralising capacity below this threshold showed higher  
190 frequencies of ABCs than the individuals above it (**Fig. 3f**). Premature expansion of ABCs is  
191 therefore seen both in patients with IEI and patients with cancer treated with ICB, and  
192 (regardless of aetiology) correlates with a reduced ability to generate and maintain  
193 neutralising antibody responses to COVID-19 vaccination.

194

195 **Premature expansion of ABCs is associated with lower levels of antigen-specific**  
196 **memory B cells**

197 Whilst circulating antibodies derived from plasma cells wane over time, long-lived  
198 immunological memory can persist in expanded clones of antigen-specific memory B cells.  
199 We therefore assessed the frequency and differentiation of circulating SARS-CoV-2 RBD-  
200 specific B cells elicited after the second dose of vaccine using multicolour flow cytometry  
201 (Supplementary **Fig. 5a**). Strikingly, RBD-binding B cells were always significantly less  
202 frequent in patients than in healthy controls (**Fig. 4a-b** and Supplementary **Fig. 5B**), and the  
203 fraction of RBD-binding B cells amongst all CD19<sup>+</sup> B cells correlated consistently with titres  
204 of neutralising antibodies (Supplementary **Fig. 5c**). In addition, RBD-specific B cell  
205 frequency immediately prior to the second vaccine dose correlated with neutralising capacity  
206 at days 8 (peak response), 21 and 105 (**Fig. 4c**). This is consistent with a causal relationship  
207 between the level of antigen-specific B cells prior to the second dose of vaccine, and the  
208 magnitude and longevity of the neutralising antibody response. Furthermore, similar to  
209 neutralising capacity, the levels of RBD-specific B cells at later timepoints could be predicted  
210 by the frequency of ABCs at day 0 (**Fig. 4d**). Individuals with the highest frequencies of  
211 ABCs showed reduced RBD-specific B cell differentiation (Supplementary **Fig. 5c-d**).

212  
213 Finally, to analyse the cellular phenotype of rare RBD-binding B cells in a comprehensive,  
214 unbiased way, we performed unsupervised clustering and UMAP visualisation of flow  
215 cytometry data from all patients and HCs at all timepoints after vaccination (**Fig. 4e**). RBD-  
216 binding B cells from both patients and HCs were observed within clusters of memory B cells  
217 and plasmablasts (**Fig. 4f**), suggesting a quantitative reduction rather than qualitative  
218 difference in the humoral response. Across all participants, the proportion of RBD-specific  
219 cells expressing plasmablast markers peaked at day 8, whilst those expressing memory B  
220 cell makers peaked a day 21 (**Fig. 4g**). Differentiation of antibody-producing cells therefore  
221 occurs contemporaneously with peak neutralisation capacity (day 8). Since increased  
222 antibody production cannot be driven by the proliferation of terminally differentiated (non-  
223 dividing) plasma cells, a sizeable contribution to the neutralising antibody response after the  
224 second dose of vaccine is likely the result of this memory B cell proliferation and  
225 differentiation. Taken together, our data therefore suggest that premature expansion of  
226 ABCs negatively impacts all aspects of the humoral immune response to COVID-19  
227 vaccination.

228

229 **Discussion**

230 While the specific causal mechanism for ABC expansion in any single older patient (to which  
231 polygenic risk alleles, ageing, therapy and obesity can all contribute) is unknown, in young  
232 patients with ultra-rare monogenic inherited disease, expansion is caused by the specific  
233 gene disrupted. Our analysis of 4 different patient groups: healthy controls, patients with  
234 cancer treated with ICB, patients with autoimmune SLE, and patients with two distinct IEI  
235 (CTLA haploinsufficiency and NFKB1 haploinsufficiency) demonstrates a homogeneity of the  
236 ABC differentiation states irrespective of the specific cause. Therefore, the pathological  
237 consequence of expanded ABCs is likely related to their increased frequency rather than an  
238 inherent difference in these cells from patients with distinct diseases. Additionally, the finding  
239 of AIRE and tissue restricted antigen expression within a small subset of Classical ABCs,  
240 cells that transcriptionally appear as professional antigen presenting cells could provide a  
241 mechanistic link between the expansion of these cells and the autoimmune toxicity  
242 associated with ICB therapy.

243

244 Most clinically relevant, however, is our finding that patients with expanded ABCs have a  
245 reduced B cell vaccine response, leading to reduced neutralisation capacity and reduced  
246 memory B cell formation. Since memory B frequency before vaccination correlates with the  
247 subsequent neutralisation response to immunisation, this predicts that there will be reduced  
248 neutralisation capacity to subsequent booster immunisation. Consequently, patients with  
249 expanded ABCs will require more frequent booster immunisation to achieve an equal level of  
250 longitudinal B cell immune protection. Overall, these results place ABC frequency as a  
251 predictive biomarker for reduced vaccine protection that could guide booster vaccination  
252 schedules for patients at risk of breakthrough infection.

253

## 254 **Methods**

### 255 **Patient recruitment and ethics**

256 Enrolment of patients into this study was based on the deficiency of particular genes of  
257 interest (IEI: CTLA4, LRBA, NFKB1, NFKB2) or clinical diagnostics (ICB, n = 19), whilst  
258 healthy controls for this study were enrolled based on their clinical healthy status (n = 10).  
259 Sample-size calculation was limited due to IEI patients in the study (n = 9) reflect a rare  
260 population of individuals within the general population that we were able to recruit  
261 (Supplementary Table 4).

262 The research was conducted in accordance with the principles of Good Clinical Practice and  
263 following granted protocols of the National Institute for Health and Care Research (NIHR)  
264 Bioresource of England or granted protocols of the Barts and the London Immunology  
265 Registry, United Kingdom. Samples were collected with the written informed consent of all



266 study participants under the NIHR BioResource - Research Tissue Bank (NBR-RTB) ethics  
267 (REC:17/EE/0025) or under the Barts and the London Immunology Registry (REC:  
268 11/LO/1689), United Kingdom. Clinical data were collected by Clinical Immunology  
269 Consultants at Cambridge University Hospital and Bart's Health at London, United Kingdom  
270 via the Electronic Healthcare Record (Epic), or direct patient contact.

271 The patients and healthy controls were consented under the East of England Cambridge  
272 South National research ethics committee (REC) reference 13/EE/0325 or Barts and the  
273 London Immunology Registry (REC: 11/LO/1689), United Kingdom.

274

#### 275 **Blood donation and separation**

276 Patients and controls gave voluntary blood samples prior to second dose and at early (day  
277 8), mid (day 21) and late (day 105) timepoints following their second BNT162b2 vaccine.  
278 Where sample size of individual assays was not the same as the total sample size, this was  
279 because there was no sample collection at those specific time points. Samples may have  
280 also been excluded if there was serological evidence of prior exposure to SARS-COV-2.  
281 Peripheral blood samples were acquired in either lithium heparin or serum separating tubes.  
282 Peripheral blood mononuclear cells (PBMCs) were isolated by a density gradient  
283 centrifugation protocol and stored at -80°C for up to a week before being transferred to liquid  
284 nitrogen until use. Whilst serum tubes were centrifuged to separate serum from cell pellet  
285 before being aliquoted and stored at -80°C until use.

286

#### 287 **Single cell library preparation and sequencing**

288 Frozen PBMCs were thawed and B cell population was enriched using magnetic separation  
289 (Miltenyi 130-101-638). Samples were next labelled with oligonucleotide-tagged antibodies  
290 against CD11c, CD21, CD27 and CD85j (TotalSeq, BioLegend). After labelled, cell counts  
291 were adjusted to 1,035 cells per microlitre before being loaded onto a Chromium Next GEM  
292 chip K (10X Genomics, 2000182) for the subsequent library's construction according to  
293 Single cell 5' v2 protocol (CG000330 RevA, 10X Genomics). The library was quality  
294 controlled by Agilent 4150 TapeStation and quantified by RT-PCR using the KAPA library  
295 quantification kit for Illumina platforms (Roche, KK4824). Samples were sequenced on an  
296 Illumina NovaSeq with a sequencing depth of at least 50, 000 reads per cell.

297

#### 298 **Software versions**

299 Single cell data was analysed using Cell Ranger software version 6.1.1, citeseq version  
300 1.5.0, R version 4.0.3 and R packages (Seurat 4.1.0, SeuratObject 4.0.4, Scuttle 1.0.4,  
301 rstatix 0.7.0, tidyverse 1.3.0 and dplyr 1.0.8). Flow cytometry data and antibody titres were

302 analysed using FlowJo 10.7.1 and GraphPad Prism 9.1.2 (225), respectively. Figures were  
303 produced using ggplot2 3.3.5, gridExtra 2.3, ComplexHeatmap 2.6.2, Nebulosa 1.0.2,  
304 RColorBrewer 1.1-2, ggrepel 0.9.1, ggpubr 0.4.0, scales 1.1.1, showtext 0.9-5 in R and  
305 GraphPad Prism 9.1.2 (225) and FlowJo 10.7.1.

306

### 307 **Preprocessing of scRNA-seq data**

308 Raw FASTQ files of the gene expression library were analysed using 10x Genomics Cell  
309 Ranger software v.6.1.1[1] and aligned to the GRCh38 genome provided by Cell Ranger. All  
310 Ig V, D, J and constant genes as well as TCR genes were deleted from the dataset so that  
311 downstream analysis is not affected by highly variable clonotype genes. For the  
312 quantification of antibody derived tags (ADT) and oligo hashtags, citeseq pipeline v.1.5.0[2]  
313 was used. The generated hashtag count matrices as well as raw gene expression count  
314 matrices were then used as inputs for the Seurat package v.4.1.0[3] in R v.4.0.3. Seurat  
315 objects were created from the corresponding transcript count matrices. ADT assays were  
316 added using CreateAssayObject function of Seurat to include expression levels of surface  
317 proteins. Samples were then demultiplexed using HTODemux function. Doublets and cells  
318 with no assigned hashtag were removed from objects for further analysis. Scuttle package  
319 v.1.0.4[4] was used for quality control. 3 x Median absolute deviation (MAD) was considered  
320 as the threshold for quality control; number of features and number of read counts were  
321 filtered from both sides, whereas percentage of mitochondrial genes was filtered from upper  
322 side. The samples were log-normalized for further differential expression analysis. Before  
323 integrating all objects, they were normalized based on regularized negative binomial  
324 regression using the SCTransform function of the Seurat package, regressing out for cell  
325 cycle scores, number of counts and percentage of mitochondrial genes. The objects were  
326 then integrated using the integration protocol of the Seurat package to perform batch effect  
327 correction. The objects used for integration include: four groups of healthy controls each  
328 having two subjects (total of 26900 cells in the final dataset), one group of IEI patients (5345  
329 cells in the final dataset) and two groups of ICB patients (total of 9751 cells in the final  
330 dataset) each having four subjects, and SLE patients with 3 subjects (10406 cells in the final  
331 dataset).

332

### 333 **SLE data**

334 Data of SLE patients from Bhamidipati et al [5] was downloaded from GSE163121,  
335 reprocessed and integrated with other objects using the same procedure as described  
336 above.

337

### 338 **Clustering of data**

339 Principal component analysis (PCA) was performed on the integrated object to reduce the  
340 dimensionality of the dataset. First, clustering was done using 30 principal components  
341 (PCs) and resolution parameter of 0.1. Clusters with a high expression of non-B cell markers  
342 were removed from the dataset. After deletion of all non-B cells, the dataset consists of  
343 52402 cells. PCs were calculated in the new dataset and unsupervised clustering was  
344 performed using 20 PCs and resolution parameter of 1.4. Cluster markers were calculated  
345 with the default parameters of the FindMarkers function. Clusters with similar markers were  
346 manually merged. Final clusters were labelled based on the differentially expressed genes in  
347 each cluster.

348 Gene ontology enrichment analysis

349 Gene ontology [6, 7] enrichment analysis was performed via PANTHER [8] from  
350 <http://www.geneontology.org> using the list of significantly upregulated genes from classical  
351 ABC cluster (Average log<sub>2</sub> fold change > 0.25 and percent expressed in each group > 0.25).

352

### 353 **Geneset Scores**

354 A list of 74 Aire-induced genes were obtained from Yamano et al., [9] after converting mouse  
355 gene IDs to human gene IDs. For calculating gene set score for each cell, AddModuleScore  
356 function from Seurat package was used.

357

### 358 **Kernel density estimation of gene expression**

359 Nebulosa package v 1.0.2 [10] was used for calculating and plotting gene-weighted density  
360 estimation of AIRE expression.

361

### 362 **SARS-CoV-2 serology**

363 A Luminex bead-based immunoassay was used to quantify specific antibodies to full-length  
364 trimeric spike (S), spike receptor binding domain (RBD) and nucleocapsid (NCP) of SARS-  
365 CoV-2 as previously described [11, 12]. Briefly, a multiplex assay was established by  
366 covalently coupling recombinant SARS-CoV-2 proteins to distinct carboxylated bead sets  
367 (Luminex, Netherlands). The S protein used here was the S-R/PP described in Xiong et al  
368 [11], and the RBD protein was described by Stadlbauer et al [13]. The NCP protein used is a  
369 truncated construct of the SARS-CoV-2 NCP protein comprising residues 48–365 (both  
370 ordered domains with the native linker) with an N terminal uncleavable hexahistidine tag.  
371 NCP was expressed in E. Coli using autoinducing media for 7h at 37°C and purified using  
372 immobilised metal affinity chromatography (IMAC), size exclusion and heparin  
373 chromatography. The S-, RBD- and NCP-coupled bead sets were incubated with patient

374 sera at 3 dilutions (1/100, 1/1000, 1/10000) for 1 h in 96-well filter plates (MultiScreen HTS;  
375 Millipore) at room temperature in the dark on a horizontal shaker. After washes, beads were  
376 incubated for 30 min with a PE-labeled anti-human IgG-Fc antibody (Leinco/Biotrend),  
377 washed as described above, and resuspended in 100  $\mu$ l PBS/ Tween. Antibody-specific  
378 binding was interpreted using Exponent Software V31 software on the Luminex analyzer  
379 (Luminex / R&D Systems) and reported as mean fluorescence intensity (MFI). The  
380 diagnostic thresholds used adhered to UK national guidelines.

381

### 382 **Neutralising antibodies to SARS-CoV-2**

383 The SARS-CoV-2 used in this study was a wildtype (lineage B) virus (SARS-CoV-  
384 2/human/Liverpool/REMRQ0001/2020), a kind gift from Ian Goodfellow (University of  
385 Cambridge), isolated early in the COVID-19 pandemic by Lance Turtle (University of  
386 Liverpool) and David Matthews and Andrew Davidson (University of Bristol) [14-16] from a  
387 patient on the Diamond Princess cruise ship. Sera were heat-inactivated at 56°C for 30 mins  
388 before use, and neutralising antibody titres at 50% inhibition (NT50s) measured as  
389 previously described [17, 18].

390 In brief, luminescent HEK293T-ACE2-30F-PLP2 reporter cells (clone B7) expressing SARS-  
391 CoV-2 Papain-like protease-activatable circularly permuted firefly luciferase (FFluc) were  
392 seeded in flat-bottomed 96-well plates. The next day, SARS-CoV-2 viral stock (MOI=0.01)  
393 was pre-incubated with a 3-fold dilution series of each serum for 2 h at 37°C, then added to  
394 the cells. 16 h post-infection, cells were lysed in Bright-Glo Luciferase Buffer (Promega)  
395 diluted 1:1 with PBS and 1% NP-40, and FFluc activity measured by luminometry.  
396 Experiments were conducted in duplicate.

397 To obtain NT50s, titration curves were plotted as FFluc vs log (serum dilution), then  
398 analysed by non-linear regression using the Sigmoidal, 4PL, X is log(concentration) function  
399 in GraphPad Prism. NT50s were reported when (1) at least 50% inhibition was observed at  
400 the lowest serum dilution tested (1:20), and (2) a sigmoidal curve with a good fit was  
401 generated. For purposes of visualisation and ranking, samples for which visual inspection of  
402 the titration curve indicated inhibition at low dilutions, but which did not meet criteria (1) and  
403 (2) above, were assigned an arbitrary NT50 of 4.

404 World Health Organisation International Standard 20/136 (WHO IS 20/136) has an NT50 of  
405 1967 against wildtype SARS-CoV-2 when measured in this assay. This standard comprises  
406 pooled convalescent plasma obtained from 11 individuals which, when reconstituted, is  
407 assigned an arbitrary neutralising capacity of 1000 IU/ml against early 2020 SARS-CoV-2  
408 isolates [19]. NT50s from this study may therefore be converted to IU/ml using a calibration

409 factor of 1000/1967 (0.51), with a limit of quantitation of 10.2 IU/ml (corresponding to an  
410 NT50 of 20).

411

#### 412 **Flow cytometric analysis of B cells**

413 Frozen PBMCs were thawed and stained with B cell panel antibody cocktail (Supplementary  
414 Table 5). All samples were acquired on the BD LSRFortessa using FACSDIVA software  
415 (BD-Biosciences). FCS files were exported and analysed using FlowJo v10.7.2 (BD-  
416 Biosciences) software. Additionally, a uniform manifold approximation and projection  
417 (UMAP) algorithm for dimensional reduction was performed on a concatenated FCS file  
418 comprising events from the CD19+ gate from HC, IEI and ICB samples analysed, utilizing  
419 the UMAP FlowJo plugin (v3.1). The composite samples were gated as indicated on  
420 Supplementary Fig. 2 for RBD+ B cell identification and then overlaid by study group in the  
421 UMAP generated, for additional visualisation. XShift (v1.4.1) and ClusterExplorer (1.5.15)  
422 plugins were used for unsupervised cluster generation and exploration, respectively. Class-  
423 switched memory B cells and plasmablasts/plasma cells were selected based on the  
424 expression of CD19+IgD-IgM-CD38-CD27+ and CD19+IgD-IgM-CD38+/highCD27+/high,  
425 respectively.

426

#### 427 **RBD tetramer production**

428 SARS-CoV-2 RBD was expressed with N-terminal fusion of His-Zbasic-TEV module (8xHis  
429 tag, Zbasic domain [20] and TEV protease cleavage site) and C-terminal Avi-tag in  
430 BL21(DE3) cells (Novagen) cultured in 2xYT media at 37°C. RBD containing inclusion  
431 bodies were isolated and solubilised. The denatured protein was first purified by immobilized  
432 metal affinity chromatography using PureCube Ni-NTA resin, eluted and refolding was  
433 allowed to proceed for 72 hours at 4°C. N-terminal fusion tag was cleaved off by NHis-  
434 TEVpro (produced in-house). Biotinylation of the RBD protein was carried out using 5 mM  
435 MgCl<sub>2</sub>, 2 mM ATP, 150 μM biotin and 50 μg/ml of biotin ligase BirA-CHis (produced in-  
436 house). The excess of biotinylated RBD protein was then incubated with 0.5 mg/ml of  
437 fluorescently labelled Streptavidin (BioLegend) for 1 hour at room temperature and, finally,  
438 RBD-Streptavidin complexes were separated by size exclusion chromatography using a  
439 Superdex 200 Increase 10/300 GL column (Cytiva). The RBD-Streptavidin complexes were  
440 then analysed by SDS-PAGE.

441

#### 442 **Statistical analysis**

443 Statistical analysis for FACS and serology data was performed using GraphPad Prism  
444 v9.1.1 (GraphPad Prism Software Inc). Two-tailed non-parametric Mann Whitney tests were

445 used to determine differences between groups. For multiple comparisons ANOVA with  
446 Tukey's multiple comparisons test was used. Associations were calculated using two-tailed  
447 Spearman's rank correlations and results are shown with linear trend levels. For the single  
448 cell data, statistical significance for paired comparisons were performed using Wilcoxon rank  
449 sum test in R.

450

451 **Data and code availability**

452 Sequencing data have been deposited in the Gene Expression Omnibus database [GEO: in  
453 preparation]. Additional information and materials and all codes for scRNA-seq analysis will  
454 be made available upon request.

455

456 **References**

457

- 458 1. Baden LR, El Sahly HM, Essink B, Kotloff K, Frey S, Novak R, *et al.* Efficacy and  
459 Safety of the mRNA-1273 SARS-CoV-2 Vaccine. *N Engl J Med* **2021**;384(5):403-16  
460 doi 10.1056/NEJMoa2035389.
- 461 2. Polack FP, Thomas SJ, Kitchin N, Absalon J, Gurtman A, Lockhart S, *et al.* Safety  
462 and Efficacy of the BNT162b2 mRNA Covid-19 Vaccine. *N Engl J Med*  
463 **2020**;383(27):2603-15 doi 10.1056/NEJMoa2034577.
- 464 3. Schmidt AL, Labaki C, Hsu CY, Bakouny Z, Balanchivadze N, Berg SA, *et al.*  
465 COVID-19 vaccination and breakthrough infections in patients with cancer. *Ann*  
466 *Oncol* **2022**;33(3):340-6 doi 10.1016/j.annonc.2021.12.006.
- 467 4. Monin L, Laing AG, Munoz-Ruiz M, McKenzie DR, Del Molino Del Barrio I,  
468 Alaguthurai T, *et al.* Safety and immunogenicity of one versus two doses of the  
469 COVID-19 vaccine BNT162b2 for patients with cancer: interim analysis of a  
470 prospective observational study. *Lancet Oncol* **2021**;22(6):765-78 doi 10.1016/S1470-  
471 2045(21)00213-8.
- 472 5. Goshen-Lago T, Waldhorn I, Holland R, Szwarcwort-Cohen M, Reiner-Benaim A,  
473 Shachor-Meyouhas Y, *et al.* Serologic Status and Toxic Effects of the SARS-CoV-2  
474 BNT162b2 Vaccine in Patients Undergoing Treatment for Cancer. *JAMA Oncol*  
475 **2021**;7(10):1507-13 doi 10.1001/jamaoncol.2021.2675.
- 476 6. Thakkar A, Gonzalez-Lugo JD, Goradia N, Gali R, Shapiro LC, Pradhan K, *et al.*  
477 Seroconversion rates following COVID-19 vaccination among patients with cancer.  
478 *Cancer Cell* **2021**;39(8):1081-90 e2 doi 10.1016/j.ccell.2021.06.002.
- 479 7. Shi J, Hou S, Fang Q, Liu X, Liu X, Qi H. PD-1 Controls Follicular T Helper Cell  
480 Positioning and Function. *Immunity* **2018**;49(2):264-74 e4 doi  
481 10.1016/j.immuni.2018.06.012.
- 482 8. Wang CJ, Heuts F, Ovcinnikovs V, Wardzinski L, Bowers C, Schmidt EM, *et al.*  
483 CTLA-4 controls follicular helper T-cell differentiation by regulating the strength of  
484 CD28 engagement. *Proc Natl Acad Sci U S A* **2015**;112(2):524-9 doi  
485 10.1073/pnas.1414576112.
- 486 9. Khoury DS, Cromer D, Reynaldi A, Schlub TE, Wheatley AK, Juno JA, *et al.*  
487 Neutralizing antibody levels are highly predictive of immune protection from  
488 symptomatic SARS-CoV-2 infection. *Nat Med* **2021**;27(7):1205-11 doi  
489 10.1038/s41591-021-01377-8.
- 490 10. Edara VV, Lai L, Sahoo MK, Floyd K, Sibai M, Solis D, *et al.* Infection and vaccine-  
491 induced neutralizing antibody responses to the SARS-CoV-2 B.1.617.1 variant.  
492 *bioRxiv* **2021** doi 10.1101/2021.05.09.443299.
- 493 11. Gilbert PB, Montefiori DC, McDermott AB, Fong Y, Benkeser D, Deng W, *et al.*  
494 Immune correlates analysis of the mRNA-1273 COVID-19 vaccine efficacy clinical  
495 trial. *Science* **2022**;375(6576):43-50 doi 10.1126/science.abm3425.
- 496 12. Das R, Bar N, Ferreira M, Newman AM, Zhang L, Bailur JK, *et al.* Early B cell  
497 changes predict autoimmunity following combination immune checkpoint blockade. *J*  
498 *Clin Invest* **2018**;128(2):715-20 doi 10.1172/JCI96798.
- 499 13. Cancro MP. Age-Associated B Cells. *Annu Rev Immunol* **2020**;38:315-40 doi  
500 10.1146/annurev-immunol-092419-031130.
- 501 14. Hao Y, O'Neill P, Naradikian MS, Scholz JL, Cancro MP. A B-cell subset uniquely  
502 responsive to innate stimuli accumulates in aged mice. *Blood* **2011**;118(5):1294-304  
503 doi 10.1182/blood-2011-01-330530.

- 504 15. Kim CC, Baccarella AM, Bayat A, Pepper M, Fontana MF. FCRL5(+) Memory B  
505 Cells Exhibit Robust Recall Responses. *Cell Rep* **2019**;27(5):1446-60 e4 doi  
506 10.1016/j.celrep.2019.04.019.
- 507 16. Rubtsov AV, Rubtsova K, Fischer A, Meehan RT, Gillis JZ, Kappler JW, *et al.* Toll-  
508 like receptor 7 (TLR7)-driven accumulation of a novel CD11c(+) B-cell population is  
509 important for the development of autoimmunity. *Blood* **2011**;118(5):1305-15 doi  
510 10.1182/blood-2011-01-331462.
- 511 17. Stewart A, Ng JC, Wallis G, Tsioligka V, Fraternali F, Dunn-Walters DK. Single-Cell  
512 Transcriptomic Analyses Define Distinct Peripheral B Cell Subsets and Discrete  
513 Development Pathways. *Front Immunol* **2021**;12:602539 doi  
514 10.3389/fimmu.2021.602539.
- 515 18. Myles A, Sanz I, Cancro MP. T-bet(+) B cells: A common denominator in protective  
516 and autoreactive antibody responses? *Curr Opin Immunol* **2019**;57:40-5 doi  
517 10.1016/j.coi.2019.01.002.
- 518 19. Rubtsov AV, Marrack P, Rubtsova K. T-bet expressing B cells - Novel target for  
519 autoimmune therapies? *Cell Immunol* **2017**;321:35-9 doi  
520 10.1016/j.cellimm.2017.04.011.
- 521 20. Pape KA, Dileepan T, Kabage AJ, Kozysa D, Batres R, Evert C, *et al.* High-affinity  
522 memory B cells induced by SARS-CoV-2 infection produce more plasmablasts and  
523 atypical memory B cells than those primed by mRNA vaccines. *Cell Rep*  
524 **2021**;37(2):109823 doi 10.1016/j.celrep.2021.109823.
- 525 21. Johnson JL, Rosenthal RL, Knox JJ, Myles A, Naradikian MS, Madej J, *et al.* The  
526 Transcription Factor T-bet Resolves Memory B Cell Subsets with Distinct Tissue  
527 Distributions and Antibody Specificities in Mice and Humans. *Immunity*  
528 **2020**;52(5):842-55 e6 doi 10.1016/j.immuni.2020.03.020.
- 529 22. Rubtsov AV, Rubtsova K, Kappler JW, Jacobelli J, Friedman RS, Marrack P. CD11c-  
530 Expressing B Cells Are Located at the T Cell/B Cell Border in Spleen and Are Potent  
531 APCs. *J Immunol* **2015**;195(1):71-9 doi 10.4049/jimmunol.1500055.
- 532 23. Gamez-Diaz L, August D, Stepensky P, Revel-Vilk S, Seidel MG, Noriko M, *et al.*  
533 The extended phenotype of LPS-responsive beige-like anchor protein (LRBA)  
534 deficiency. *J Allergy Clin Immunol* **2016**;137(1):223-30 doi  
535 10.1016/j.jaci.2015.09.025.
- 536 24. Kuehn HS, Ouyang W, Lo B, Deenick EK, Niemela JE, Avery DT, *et al.* Immune  
537 dysregulation in human subjects with heterozygous germline mutations in CTLA4.  
538 *Science* **2014**;345(6204):1623-7 doi 10.1126/science.1255904.
- 539 25. Schwab C, Gabrysch A, Olbrich P, Patino V, Warnatz K, Wolff D, *et al.* Phenotype,  
540 penetrance, and treatment of 133 cytotoxic T-lymphocyte antigen 4-insufficient  
541 subjects. *J Allergy Clin Immunol* **2018**;142(6):1932-46 doi  
542 10.1016/j.jaci.2018.02.055.
- 543 26. Tuijnburg P, Lango Allen H, Burns SO, Greene D, Jansen MH, Staples E, *et al.*  
544 Loss-of-function nuclear factor kappaB subunit 1 (NFKB1) variants are the most  
545 common monogenic cause of common variable immunodeficiency in Europeans. *J*  
546 *Allergy Clin Immunol* **2018**;142(4):1285-96 doi 10.1016/j.jaci.2018.01.039.
- 547 27. Schubert D, Bode C, Kenefeck R, Hou TZ, Wing JB, Kennedy A, *et al.* Autosomal  
548 dominant immune dysregulation syndrome in humans with CTLA4 mutations. *Nat*  
549 *Med* **2014**;20(12):1410-6 doi 10.1038/nm.3746.
- 550 28. Haslam A, Gill J, Prasad V. Estimation of the Percentage of US Patients With Cancer  
551 Who Are Eligible for Immune Checkpoint Inhibitor Drugs. *JAMA Netw Open*  
552 **2020**;3(3):e200423 doi 10.1001/jamanetworkopen.2020.0423.



- 553 29. Bhamidipati K, Silberstein JL, Chaichian Y, Baker MC, Lanz TV, Zia A, *et al.* CD52  
554 Is Elevated on B cells of SLE Patients and Regulates B Cell Function. *Front Immunol*  
555 **2020**;11:626820 doi 10.3389/fimmu.2020.626820.
- 556 30. Schwab C, Gabrysch A, Olbrich P, Patino V, Warnatz K, Wolff D, *et al.* Phenotype,  
557 penetrance, and treatment of 133 cytotoxic T-lymphocyte antigen 4-insufficient  
558 subjects. *J Allergy Clin Immunol* **2018** doi 10.1016/j.jaci.2018.02.055.
- 559 31. Isnardi I, Ng YS, Menard L, Meyers G, Saadoun D, Srdanovic I, *et al.* Complement  
560 receptor 2/CD21- human naive B cells contain mostly autoreactive unresponsive  
561 clones. *Blood* **2010**;115(24):5026-36 doi 10.1182/blood-2009-09-243071.
- 562 32. Terrier B, Joly F, Vazquez T, Benech P, Rosenzweig M, Carpentier W, *et al.*  
563 Expansion of functionally anergic CD21-/low marginal zone-like B cell clones in  
564 hepatitis C virus infection-related autoimmunity. *J Immunol* **2011**;187(12):6550-63  
565 doi 10.4049/jimmunol.1102022.
- 566 33. Gies V, Guffroy A, Danion F, Billaud P, Keime C, Fauny JD, *et al.* B cells  
567 differentiate in human thymus and express AIRE. *J Allergy Clin Immunol*  
568 **2017**;139(3):1049-52 e12 doi 10.1016/j.jaci.2016.09.044.
- 569 34. Yamano T, Nedjic J, Hinterberger M, Steinert M, Koser S, Pinto S, *et al.* Thymic B  
570 Cells Are Licensed to Present Self Antigens for Central T Cell Tolerance Induction.  
571 *Immunity* **2015**;42(6):1048-61 doi 10.1016/j.immuni.2015.05.013.
- 572 35. Hubert FX, Kinkel SA, Webster KE, Cannon P, Crewther PE, Proietto AI, *et al.* A  
573 specific anti-Aire antibody reveals aire expression is restricted to medullary thymic  
574 epithelial cells and not expressed in periphery. *J Immunol* **2008**;180(6):3824-32 doi  
575 10.4049/jimmunol.180.6.3824.
- 576 36. Mathis D, Benoist C. Aire. *Annu Rev Immunol* **2009**;27:287-312 doi  
577 10.1146/annurev.immunol.25.022106.141532.
- 578 37. Fergusson JR, Morgan MD, Bruchard M, Huitema L, Heesters BA, van Unen V, *et al.*  
579 Maturing Human CD127+ CCR7+ PDL1+ Dendritic Cells Express AIRE in the  
580 Absence of Tissue Restricted Antigens. *Front Immunol* **2018**;9:2902 doi  
581 10.3389/fimmu.2018.02902.
- 582 38. Rubtsova K, Rubtsov AV, Thurman JM, Mennona JM, Kappler JW, Marrack P. B  
583 cells expressing the transcription factor T-bet drive lupus-like autoimmunity. *J Clin*  
584 *Invest* **2017**;127(4):1392-404 doi 10.1172/JCI91250.
- 585 39. Phalke S, Rivera-Correa J, Jenkins D, Flores Castro D, Giannopoulou E, Pernis AB.  
586 Molecular mechanisms controlling age-associated B cells in autoimmunity. *Immunol*  
587 *Rev* **2022**;307(1):79-100 doi 10.1111/imr.13068.
- 588 40. Melo-Lima BL, Poras I, Passos GA, Carosella ED, Donadi EA, Moreau P. The  
589 Autoimmune Regulator (Aire) transactivates HLA-G gene expression in thymic  
590 epithelial cells. *Immunology* **2019**;158(2):121-35 doi 10.1111/imm.13099.
- 591 41. Gerber PP, Duncan LM, Greenwood EJ, Marelli S, Naamati A, Teixeira-Silva A, *et*  
592 *al.* A protease-activatable luminescent biosensor and reporter cell line for authentic  
593 SARS-CoV-2 infection. *PLoS Pathog* **2022**;18(2):e1010265 doi  
594 10.1371/journal.ppat.1010265.
- 595 42. Baang JH, Smith C, Mirabelli C, Valesano AL, Manthei DM, Bachman MA, *et al.*  
596 Prolonged Severe Acute Respiratory Syndrome Coronavirus 2 Replication in an  
597 Immunocompromised Patient. *J Infect Dis* **2021**;223(1):23-7 doi  
598 10.1093/infdis/jiaa666.
- 599 43. Buckland MS, Galloway JB, Fhogartaigh CN, Meredith L, Provine NM, Bloor S, *et*  
600 *al.* Treatment of COVID-19 with remdesivir in the absence of humoral immunity: a  
601 case report. *Nat Commun* **2020**;11(1):6385 doi 10.1038/s41467-020-19761-2.
- 602

603 **Figure Legends**

604

605 **Figure 1. Single cell transcriptional signature of ABCs.** Magnetically enriched B cells  
606 from PBMCs were analysed through droplet-based single cell RNA sequencing technology  
607 (n = 52402). **a-c.** UMAPs of cells from all individuals coloured by **(a)** annotated Louvain  
608 clusters, **(b)** health condition (HC, healthy controls; ICB, immune-checkpoint blockade  
609 treated cancer patients; IEI CTLA-4/NFKB1, inborn errors of immunity, CTLA-4 and NFKB1  
610 mutants respectively; SLE, systemic lupus erythematosus patients), and **(c)** gender. Dots  
611 represent a single cell. **d.** Proportion of total cells from each health condition belonging to  
612 each cluster, clusters coloured as indicated. **e.** Expression of 46 genes in each B cell cluster  
613 which define the different subpopulations. Dot size represents proportion of cells within a  
614 cluster expressing the indicated gene and colours represent the average expression level. **f.**  
615 Heatmap representing scaled expression values of genes associated with antigen uptake,  
616 processing and class-II presentation in each cluster. **g.** Gene ontology enrichment analysis  
617 of biological processes associated with upregulated genes in classical ABCs. GO terms with  
618 highest fold enrichments are ranked by  $-\log(P \text{ value})$ . Dot size is proportional to the fold  
619 enrichment.

620

621 **Figure 2. Classical ABC expression of AIRE and AIRE target genes.** **a.** Volcano plot  
622 displaying the differentially expressed genes in ABCs compared to other B cell clusters.  
623 Upregulated genes associated with antigen uptake, processing and MHC class II  
624 presentation are labelled. AIRE gene is coloured in green. **b.** UMAP of all B cells coloured  
625 by kernel density estimation of AIRE expression level across all identified B cell subsets.  
626 UMAP showing the different B cell clusters inset. **c.** Percentage of cells which are AIRE<sup>+</sup>  
627 in each cluster. **d.** Violin plot comparing expression score of tissue restricted antigens (gene  
628 set from Yamano *et al*) in AIRE expressing cells and all other cells. Statistical testing via  
629 Wilcoxon rank sum test.

630

631 **Figure 3. Correlation between frequency of ABCs and neutralising antibody response**  
632 **to COVID-19 vaccination.** **a.** Cohort details. Samples were collected at days 0, 8, 21 and  
633 105 after the 2nd dose of BNT162b2 vaccine (healthy controls (HC), grey; patients with rare  
634 inborn errors of immunity (IEI): NFKB1 red, CTLA-4 and unclassified orange; patients  
635 treated with ICB, blue). **b.** Representative FACS contour plots of CD21<sup>lo</sup>CD11c<sup>+</sup> ABCs in  
636 CD19 B cells. **c.** Frequencies of B cells within total lymphocytes and frequencies ABCs  
637 within total B cells, at day 0. **d.** Neutralising antibody titres at 50% inhibition (NT<sub>50</sub>) against  
638 wildtype SARS-CoV-2 at indicated timepoints after 2<sup>nd</sup> vaccine dose. The limit of detection of

639 the assay is indicated (grey dotted line at  $NT_{50} = 20$ ), and an arbitrary threshold at the  
640 highest  $NT_{50}$  from the HC group at day 0 (brown dashed line). **e.** Correlations between  
641 frequencies of ABCs amongst B cells at day 0 and  $NT_{50}$ s at days 8, 21 and 105. **f.**  
642 Frequencies of ABCs amongst  $CD19^+$  B cells for individuals above and below the arbitrary  
643 threshold indicated in panel **d** at day 105. Where specified, differences between groups  
644 were determined using two-tailed non-parametric Mann Whitney tests. Spearman's rank  
645 correlation coefficients ( $\rho$ ) are shown, together with indicative linear regression lines plus,  
646 **c-f** each point represents one individual.

647

648 **Figure 4. Correlation between frequency of RBD-specific B cells and neutralising**  
649 **antibody response to COVID-19 vaccination.** **a.** Representative flow cytometry plots  
650 displaying RBD-specific B cell populations amongst total  $CD19^+$  B cells for different study  
651 groups 0, 8, 21 and 105 days (D0, D8, D21 and D105) after the second dose of BNT162b2  
652 vaccine. **b.** Frequencies of RBD-specific B cells amongst all  $CD19^+$  B cells in HC, IEI and  
653 ICB patients at days 0, 8, 21 and 105. Each dot represents a single individual (healthy  
654 controls (HC), grey; patients with rare inborn errors of immunity (IEI): (NFKB1) red, (CTLA-4  
655 and unclassified) orange; patients treated with ICB, blue). **c.** Correlations between  
656 frequencies of RBD-specific B cells amongst all  $CD19^+$  B cells at day 0 and  $NT_{50}$ s at days 8,  
657 21 and 105. **d.** Correlations between frequencies of ABCs amongst B cells at day 0 and  
658 frequencies of RBD-specific B cells at days 8, 21 and 105. **e.** UMAP projection of total B  
659 cells from all donors at all time points displaying memory B cell (MBCs, purple) and  
660 plasmablast (PBs, green) populations. **f.** RBD-specific B cells with MBC (purple) or PB  
661 (green) phenotype are shown at days 0, 8, 21 and 105 (columns) for HC (top), IEI (middle)  
662 and ICB (bottom) groups. **g.** Kinetics of RBD-binding cell frequencies amongst MBCs or  
663 PBs. Samples with no detectable levels of RBD-specific cells are plotted at an arbitrary  
664 value of  $10^{-4}$  in (B) and  $10^{-3}$  in (G). Where specified, statistical significance between groups  
665 was determined using one-way ANOVA (G). P values for panel B are shown in  
666 Supplementary Fig. 5. Spearman's rank correlation coefficients ( $\rho$ ) are shown, together  
667 with indicative linear regression lines where appropriate.

668

669 **Supplemental Figures and Tables**

670 **Supplementary Figure 1. Age-associated B cells converge transcriptionally amongst**  
671 **individuals despite their disparate aetiology. a.** Magnetically enriched B cells from  
672 PBMCs were labelled using barcode featuring and analysed through droplet-based single  
673 cell RNA sequencing technology. Expression of surface protein CD11c against CD21 in all B  
674 cells. **b.** Violin plots of CD21 and CD11c surface protein expression in ABCs versus other B  
675 cells with CLR-normalised expression values. Statistical testing via Wilcoxon rank sum test  
676 with Bonferroni correction. **c.** UMAPs of total B cells per health condition coloured by  
677 annotated clusters (HC, healthy controls; ICB, immune-checkpoint blockade treated patients;  
678 IEI CTLA-4/NFKB1, immune errors of immunity, CTLA-4 and NFKB1 mutants respectively;  
679 SLE, systemic lupus erythematosus patients). **d.** Number of samples from each gender,  
680 coloured as indicated, in each health condition group. **e.** Clusters, with percentages of cells  
681 from each gender coloured as indicated. **f.** Clusters, with percentages of cells from each  
682 health condition coloured as indicated. Dots represent a single cell (a-c).

683

684 **Supplementary Figure 2. Class-I related genes expression within the different B cell**  
685 **clusters.** Heatmap representing scaled expression values of genes associated with antigen  
686 uptake, processing and class-I presentation in each cluster.

687

688 **Supplementary Figure 3. Classical age-associated B cells upregulate AIRE in different**  
689 **health conditions. a.** UMAP of total B cells showing AIRE+ cells coloured by density of  
690 expression. **b.** UMAPs of total B cells per health condition coloured by kernel density  
691 estimation of AIRE expression level (HC, healthy controls; ICB, immune-checkpoint  
692 blockade treated patients; IEI CTLA-4/NFKB1, immune errors of immunity, CTLA-4 and  
693 NFKB1 mutants respectively; SLE, systemic lupus erythematosus patients).

694

695 **Supplementary Figure 4. Decline of the neutralisation capacity after second dose of**  
696 **BNT162b2 vaccine. a.** Gating strategy to identify age-associated B cell (ABCs,  
697 SingletsLiveCD3-CD19+CD21-CD11+) subset from total B cell population (CD19+). **b.** IgG  
698 end-point titres specific to the spike (S), receptor-binding domain (RBD) and nucleocapsid  
699 (NCP) proteins of SARS-CoV2 at day 21 after the second dose of BNT162b2 vaccine. **c.**  
700 Neutralising antibody titres at 50% inhibition (NT<sub>50</sub>) against wildtype SARS-CoV-2 at  
701 indicated timepoints after 2<sup>nd</sup> dose of BNT162b2 vaccine (healthy controls (HC), grey;  
702 patients with rare inborn errors of immunity (IEI): (NFKB1) red, (CTLA-4 and unclassified)  
703 orange; patients treated with ICB, blue). The limit of detection of the assays is shown (grey

704 dotted line at  $NT_{50} = 20$ ). Where specified, statistical significance between groups was  
705 determined using 2-way ANOVA with Tukey's multiple comparisons test.

706 **Supplementary Figure 5. Accumulation of age-associated B cells impairs humoral**  
707 **responses to COVID-19 vaccination. a.** Gating strategy to identify RBD-specific B cell  
708 (SingletsLiveStreptavidinBV711-CD19+RBDAF488+RBDAF647+) subset after the second  
709 dose of BNT162b2 vaccine. **b.** Two-way ANOVA with Tukey's multiple comparisons test for  
710 statistical analysis of RBD-binding B cells amongst groups. P values are indicated. **c.**  
711 Multiple variable dot plots showing Spearman correlations between RBD-specific B cells and  
712  $NT_{50}$  at days 8, 21 and 105 after the second dose of BNT162b2 vaccine. Dot size represents  
713 ABC frequency per individual. **d.** Correlation matrix using Spearman's rank correlation  
714 amongst ABC and B cell frequencies at day 0; and RBD frequencies and  $NT_{50}$  values at  
715 days 0, 8, 21 and 105 for the second dose of BNT162b2 vaccine. Data include all samples  
716 enrolled in the study; Rho values are shown per correlation.

717

718 **Supplementary Table 1 – Differentially expressed genes related to Figure 1e**

719 **Supplementary Table 2 – Top 20 biological processes from the gene ontology**  
720 **enrichment analysis**

721 **Supplementary Table 3 – Differentially expressed genes related to Figure 2a**

722 **Supplementary Table 4 – Characteristics of Inborn Errors of Immunity (IEI) patients**  
723 **and Immune Checkpoint blockade treated (ICB) patients**

724 **Supplementary Table 5 – Flow cytometry antibodies details**

725

## 726 **Acknowledgements**

727 This work was funded by the MRC (grant ref. MC\_UU\_00025/12), the Medical Research  
728 Foundation (MRF-057-0002-RG-THAV-C0798) and The Evelyn Trust (grant number 20/40).  
729 NM was supported by the MRC (CSF ref. MR/P008801/1 to NJM), NHSBT (grant ref.  
730 WPA15-02 to NJM) and Addenbrooke's Charitable Trust (grant ref. 900239 to NJM). The  
731 authors thank the Flow Cytometry Services provided by Lucia Pereira Giraldez at the MRC-  
732 Toxicology Unit, University of Cambridge and Katarzyna Kania from CRUK-CI-Genomics for  
733 advice on single cell RNA sequencing experiments.

734

## 735 **Competing interest**

736 The authors declare no competing financial interests.

737

## 738 **Corresponding Authors**

739 Correspondence and requests for materials should be addressed to James Thaventhiran  
740 (jedt2@cam.ac.uk) and Juan Carlos Yam-Puc (jcy28@cam.ac.uk).  
741

742 **CITIID-NIHR BioResource COVID-19 Collaboration**

743 Stephen Baker<sup>2,6</sup>, John Bradley<sup>1,3,6,11,15</sup>, Patrick Chinnery<sup>3,23,24</sup>, Daniel Cooper<sup>11, 25</sup>,  
744 Gordon Dougan<sup>2,6</sup>, Ian Goodfellow<sup>7</sup>, Ravindra Gupta<sup>2,6,13,16</sup>, Nathalie Kingston<sup>3,4</sup>, Paul J.  
745 Lehner<sup>2,6,13</sup>, Paul A. Lyons<sup>2,6</sup>, Nicholas J. Matheson<sup>2,6,13,33</sup>, Caroline Saunders<sup>9</sup>, Kenneth G.  
746 C. Smith<sup>2,6</sup>, Charlotte Summers<sup>6,12,26</sup>, James Thaventhiran<sup>19</sup>, M. Estee Torok<sup>6,13,14</sup>, Mark R.  
747 Toshner<sup>6,8,26</sup>, Michael P. Weekes<sup>2,6,13,34</sup>, Gisele Alvio<sup>9</sup>, Sharon Baker<sup>9</sup>, Areti Bermpieri<sup>9</sup>, Karen  
748 Brookes<sup>9</sup>, Ashlea Bucke, Jo Calder, Laura Canna, Cherry Crucusio, Isabel Cruz<sup>9</sup>, Ranalie de  
749 Jesus<sup>9</sup>, Katie Dempsey<sup>9</sup>, Giovanni Di Stephano<sup>9</sup>, Jason Domingo<sup>9</sup>, Anne Elmer<sup>9</sup>, Julie  
750 Harris, Sarah Hewitt, Heather Jones<sup>9</sup>, Sherly Jose<sup>9</sup>, Jane Kennet, Yvonne King, , Jenny  
751 Kourampa<sup>9</sup>, Emily Li, Caroline McMahon<sup>9</sup>, Anne Meadows, Vivien Mendoza<sup>9</sup>, Criona  
752 O'Brien, Charmain Ocaya<sup>9</sup>, Ciro Pasquale<sup>9</sup>, Marlyn Perales<sup>9</sup>, Jane Price, Rebecca Rastall,  
753 Carla Ribeiro<sup>9</sup>, Jane Rowlands, Valentina Ruffolo, Hugo Tordesillas, Phoebe Vargas<sup>9</sup>, Bensi  
754 Vergese<sup>9</sup>, Laura Watson<sup>9</sup>, Jieniean Worsley<sup>9</sup>, Julie-Ann Zerrudo<sup>9</sup>, Laura Bergamashi<sup>2,6</sup>,  
755 Ariana Betancourt, Georgie Bower, Ben Bullman, Chiara Cossetti, Aloka De Sa, Benjamin J.  
756 Dunmore, Maddie Epping, Stuart Fawke, Stefan Gräf<sup>3,6</sup>, Richard Grenfell, Andrew Hinch,  
757 Josh Hodgson, Christopher Huang, Oisín Huhn, Kelvin Hunter<sup>2,6</sup>, Isobel Jarvis, Emma  
758 Jones, Maša Josipović, Ekaterina Legchenko, Daniel Lewis, Joe Marsden, Jennifer Martin,  
759 Federica Mescia<sup>2,6</sup>, Ciara O'Donnell, Ommar Omarjee, Marianne Perera, Linda Pointon,  
760 Nicole Pond, Nathan Richoz, Nika Romashova, Natalia Savoinykh, Rahul Sharma, Joy Shih,  
761 Mateusz Strezlecki, Rachel Sutcliffe, Tobias Tilly, Zhen Tong, Carmen Treacy, Lori Turner,  
762 Jennifer Wood, Marta Wylot, John Allison<sup>3,4</sup>, Heather Biggs<sup>3,18</sup>, John R. Bradley<sup>1,3,6,11,15</sup>,  
763 Helen Butcher<sup>3,5</sup>, Daniela Caputo<sup>3,5</sup>, Matt Chandler<sup>3,5</sup>, Patrick Chinnery<sup>3,23,24</sup>, Debbie  
764 Clapham-Riley<sup>3,5</sup>, Eleanor Dewhurst<sup>3,5</sup>, Christian Fernandez<sup>3,4</sup>, Anita Furlong<sup>3,5</sup>, Barbara  
765 Graves<sup>3,5</sup>, Jennifer Gray<sup>3,5</sup>, Sabine Hein<sup>3,5</sup>, Tasmin Ivers<sup>3,5</sup>, Emma Le Gresley<sup>3,5</sup>, Rachel  
766 Linger<sup>3,5</sup>, Mary Kasanicki<sup>3,11</sup>, Rebecca King<sup>3,5</sup>, Nathalie Kingston<sup>3,4</sup>, Sarah Meloy<sup>3,5</sup>, Alexei  
767 Moulton<sup>3,5</sup>, Francesca Muldoon<sup>3,5</sup>, Nigel Ovington<sup>3,4</sup>, Sofia Papadia<sup>3,5</sup>, Christopher J.  
768 Penkett<sup>3,4</sup>, Isabel Phelan<sup>3,5</sup>, Venkatesh Ranganath<sup>3,4</sup>, Roxana Paraschiv<sup>3,4</sup>, Abigail Sage<sup>3,5</sup>,  
769 Jennifer Sambrook<sup>3,4</sup>, Ingrid Scholtes<sup>3,5</sup>, Katherine Schon<sup>3,17,18</sup>, Hannah Stark<sup>3,5</sup>, Kathleen E.  
770 Stirrups<sup>3,4</sup>, Paul Townsend<sup>3,4</sup>, Neil Walker<sup>3,4</sup>, Jennifer Webster<sup>3,5</sup>, Mayurun Selvan<sup>35</sup>, Petra,  
771 Polgarova<sup>12</sup>, Sarah L. Caddy<sup>2,6</sup>, Laura G. Caller<sup>20,21</sup>, Yasmin Chaudhry<sup>7</sup>, Martin D. Curran<sup>22</sup>,  
772 Theresa Feltwell<sup>6</sup>, Stewart Fuller<sup>20</sup>, Iliana Georgana<sup>7</sup>, Grant Hall<sup>7</sup>, William L. Hamilton<sup>6,13,14</sup>,  
773 Myra Hosmillo<sup>7</sup>, Charlotte J. Houldcroft<sup>6</sup>, Rhys Izuagbe<sup>7</sup>, Aminu S. Jahun<sup>7</sup>, Fahad A.  
774 Khokhar<sup>2,6</sup>, Anna G. Kovalenko<sup>7</sup>, Luke W. Meredith<sup>7</sup>, Surendra Parmar<sup>22</sup>, Malte L. Pinckert<sup>7</sup>,  
775 Anna Yakovleva<sup>7</sup>, Emily C. Horner<sup>19</sup>, Lucy Booth<sup>19</sup>, Alexander Ferreira<sup>19</sup>, Rebecca Boston<sup>19</sup>,  
776 Robert Hughes<sup>19</sup>, Juan Carlos Yam Puc<sup>19</sup>, Nonantzin Beristain-Covarrubias<sup>19</sup>, Maria Rust<sup>19</sup>,

777 Thevinya Gurugama<sup>19</sup>, Lihinya Gurugama<sup>19</sup>, Thomas Mulroney<sup>19</sup>, Sarah Spencer<sup>19</sup>, Zhaleh  
778 Hosseini<sup>19</sup>, Kate Williamson<sup>19</sup>.

779

780 <sup>1</sup>NIHR Cambridge Biomedical Research Centre, Cambridge Biomedical Campus,  
781 Cambridge, UK

782 <sup>2</sup>Cambridge Institute of Therapeutic Immunology and Infectious Disease (CITIID), Jeffrey  
783 Cheah Biomedical Centre, Cambridge Biomedical Campus, Cambridge, UK

784 <sup>3</sup>NIHR BioResource, Cambridge University Hospitals NHS Foundation Trust, Cambridge  
785 Biomedical Campus, Cambridge, UK

786 <sup>4</sup>Department of Haematology, School of Clinical Medicine, University of Cambridge,  
787 Cambridge Biomedical Campus, Cambridge, UK

788 <sup>5</sup>Department of Public Health and Primary Care, School of Clinical Medicine, University of  
789 Cambridge, Cambridge Biomedical Campus, Cambridge, UK

790 <sup>6</sup>Department of Medicine, School of Clinical Medicine, University of Cambridge, Cambridge  
791 Biomedical Campus, Cambridge, UK

792 <sup>7</sup>Division of Virology, Department of Pathology, University of Cambridge, Cambridge, UK

793 <sup>8</sup>Royal Papworth Hospital NHS Foundation Trust, Cambridge, UK

794 <sup>9</sup>Cambridge Clinical Research Centre, Addenbrooke's Hospital, Cambridge University  
795 Hospitals NHS Foundation Trust, Cambridge, UK

796 <sup>10</sup>Intensive Care Unit, Royal Papworth Hospital NHS Foundation Trust, Cambridge, UK

797 <sup>11</sup>Addenbrooke's Hospital, Cambridge University Hospitals NHS Foundation Trust,  
798 Cambridge Biomedical Campus, Cambridge, UK

799 <sup>12</sup>Intensive Care Unit, Addenbrooke's Hospital, Cambridge University Hospitals NHS  
800 Foundation Trust, Cambridge Biomedical Campus, Cambridge, UK

801 <sup>13</sup>Department of Infectious Diseases, Addenbrooke's Hospital, Cambridge University NHS  
802 Hospitals Foundation Trust, Cambridge, UK

803 <sup>14</sup>Department of Microbiology, Addenbrooke's Hospital, Cambridge University NHS Hospitals  
804 Foundation Trust, Cambridge, UK

805 <sup>15</sup>Department of Renal Medicine, Addenbrooke's Hospital, Cambridge University Hospitals  
806 NHS Foundation Trust, Cambridge, UK

807 <sup>16</sup>Africa Health Research Institute, Durban, South Africa

808 <sup>17</sup>Clinical Genetics, Addenbrooke's Hospital, Cambridge University Hospitals NHS  
809 Foundation Trust, Cambridge, UK

810 <sup>18</sup>Department of Clinical Neurosciences, School of Clinical Medicine, University of  
811 Cambridge, Cambridge Biomedical Campus, Cambridge, UK

812 <sup>19</sup>MRC Toxicology Unit, Gleeson Building, Tennis Court Road, Cambridge, UK



813 <sup>20</sup>University of Cambridge, Cambridge, UK  
814 <sup>21</sup>The Francis Crick Institute, London, UK  
815 <sup>22</sup>Public Health England, Clinical Microbiology and Public Health Laboratory, Cambridge, UK  
816 <sup>23</sup>Department of Clinical Neurosciences, School of Clinical Medicine, University of  
817 Cambridge, Cambridge Biomedical Campus, Cambridge, UK  
818 <sup>24</sup>Medical Research Council Mitochondrial Biology Unit, Cambridge Biomedical Campus,  
819 Cambridge, UK  
820 <sup>25</sup>Global and Tropical Health Division, Menzies School of Heath Research and Charles  
821 Darwin University, Darwin, Northern Territory, Australia  
822 <sup>26</sup>Heart and Lung Research Institute, Cambridge Biomedical Campus, Cambridge, UK  
823 <sup>27</sup>Department of Rheumatology, Addenbrooke's Hospital, Cambridge University Hospitals  
824 NHS Foundation Trust, Cambridge, UK  
825 <sup>28</sup>Cambridge Cancer Trials Centre, Addenbrooke's Hospital, Cambridge University Hospitals  
826 NHS Foundation Trust, Cambridge, UK  
827 <sup>29</sup>Department of Paediatrics, University of Cambridge, Cambridge Biomedical Campus,  
828 Cambridge, UK  
829 <sup>30</sup>Patient Safety, Addenbrooke's Hospital, Cambridge University Hospitals NHS Foundation  
830 Trust, Cambridge, UK  
831 <sup>31</sup>Clinical Research Network: Eastern, Addenbrooke's Hospital, Cambridge University  
832 Hospitals NHS Foundation Trust, Cambridge, UK  
833 <sup>32</sup>Institute of Metabolic Science, Addenbrooke's Hospital, Cambridge University Hospitals  
834 NHS Foundation Trust, Cambridge, UK  
835 <sup>33</sup>NHS Blood and Transplant, Cambridge, UK  
836 <sup>34</sup>Cambridge Institute for Medical Research, Biomedical Campus, Hills Rd, Cambridge UK  
837 <sup>35</sup> Department of Respiratory Medicine, Cambridge University Hospitals NHS Foundation  
838 Trust, Cambridge, UK  
839  
840

841 **Method references**

842

843 1. Zheng, G.X., et al., Massively parallel digital transcriptional profiling of single cells.  
844 Nat Commun, 2017. 8: p. 14049.

845 2. Roelli, P., B. Flynn, and G. Gui, Hoohm/CITE-seq-Count: 1.5.0. . Zenodo, 2019.

846 3. Hao, Y., et al., Integrated analysis of multimodal single-cell data. Cell, 2021. 184(13):  
847 p. 3573-3587 e29.

848 4. McCarthy, D.J., et al., Scater: pre-processing, quality control, normalization and  
849 visualization of single-cell RNA-seq data in R. Bioinformatics, 2017. 33(8): p. 1179-1186.

850 5. Bhamidipati, K., et al., CD52 Is Elevated on B cells of SLE Patients and Regulates B  
851 Cell Function. Front Immunol, 2020. 11: p. 626820.

852 6. Ashburner, M., et al., Gene ontology: tool for the unification of biology. The Gene  
853 Ontology Consortium. Nat Genet, 2000. 25(1): p. 25-9.

854 7. Gene Ontology, C., The Gene Ontology resource: enriching a GOld mine. Nucleic  
855 Acids Res, 2021. 49(D1): p. D325-D334.

856 8. Mi, H., et al., PANTHER version 14: more genomes, a new PANTHER GO-slim and  
857 improvements in enrichment analysis tools. Nucleic Acids Res, 2019. 47(D1): p. D419-D426.

858 9. Yamano, T., et al., Thymic B Cells Are Licensed to Present Self Antigens for Central  
859 T Cell Tolerance Induction. Immunity, 2015. 42(6): p. 1048-61.

860 10. Alquicira-Hernandez, J. and J.E. Powell, Nebulosa recovers single cell gene  
861 expression signals by kernel density estimation. Bioinformatics, 2021.

862 11. Xiong, X., et al., A thermostable, closed SARS-CoV-2 spike protein trimer. Nat Struct  
863 Mol Biol, 2020. 27(10): p. 934-941.

864 12. Collier, D.A., et al., Age-related immune response heterogeneity to SARS-CoV-2  
865 vaccine BNT162b2. Nature, 2021. 596(7872): p. 417-422.

866 13. Stadlbauer, D., et al., SARS-CoV-2 Seroconversion in Humans: A Detailed Protocol  
867 for a Serological Assay, Antigen Production, and Test Setup. Curr Protoc Microbiol, 2020.  
868 57(1): p. e100.

869 14. Daly, J.L., et al., Neuropilin-1 is a host factor for SARS-CoV-2 infection. Science,  
870 2020. 370(6518): p. 861-865.

871 15. Moore, S.C., et al., Amplicon-Based Detection and Sequencing of SARS-CoV-2 in  
872 Nasopharyngeal Swabs from Patients With COVID-19 and Identification of Deletions in the  
873 Viral Genome That Encode Proteins Involved in Interferon Antagonism. Viruses, 2020.  
874 12(10).

875 16. Patterson, E.I., et al., Methods of Inactivation of SARS-CoV-2 for Downstream  
876 Biological Assays. J Infect Dis, 2020. 222(9): p. 1462-1467.

- 877 17. Bergamaschi, L., et al., Longitudinal analysis reveals that delayed bystander CD8+ T  
878 cell activation and early immune pathology distinguish severe COVID-19 from mild disease.  
879 Immunity, 2021. 54(6): p. 1257-1275 e8.
- 880 18. Gerber, P.P., et al., A protease-activatable luminescent biosensor and reporter cell  
881 line for authentic SARS-CoV-2 infection. PLoS Pathog, 2022. 18(2): p. e1010265.
- 882 19. Knezevic, I., et al., WHO International Standard for evaluation of the antibody  
883 response to COVID-19 vaccines: call for urgent action by the scientific community. Lancet  
884 Microbe, 2022. 3(3): p. e235-e240.
- 885 20. Hedhammar, M. and S. Hober, Z(basic)--a novel purification tag for efficient protein  
886 recovery. J Chromatogr A, 2007. 1161(1-2): p. 22-8.
- 887

**Figure 1**

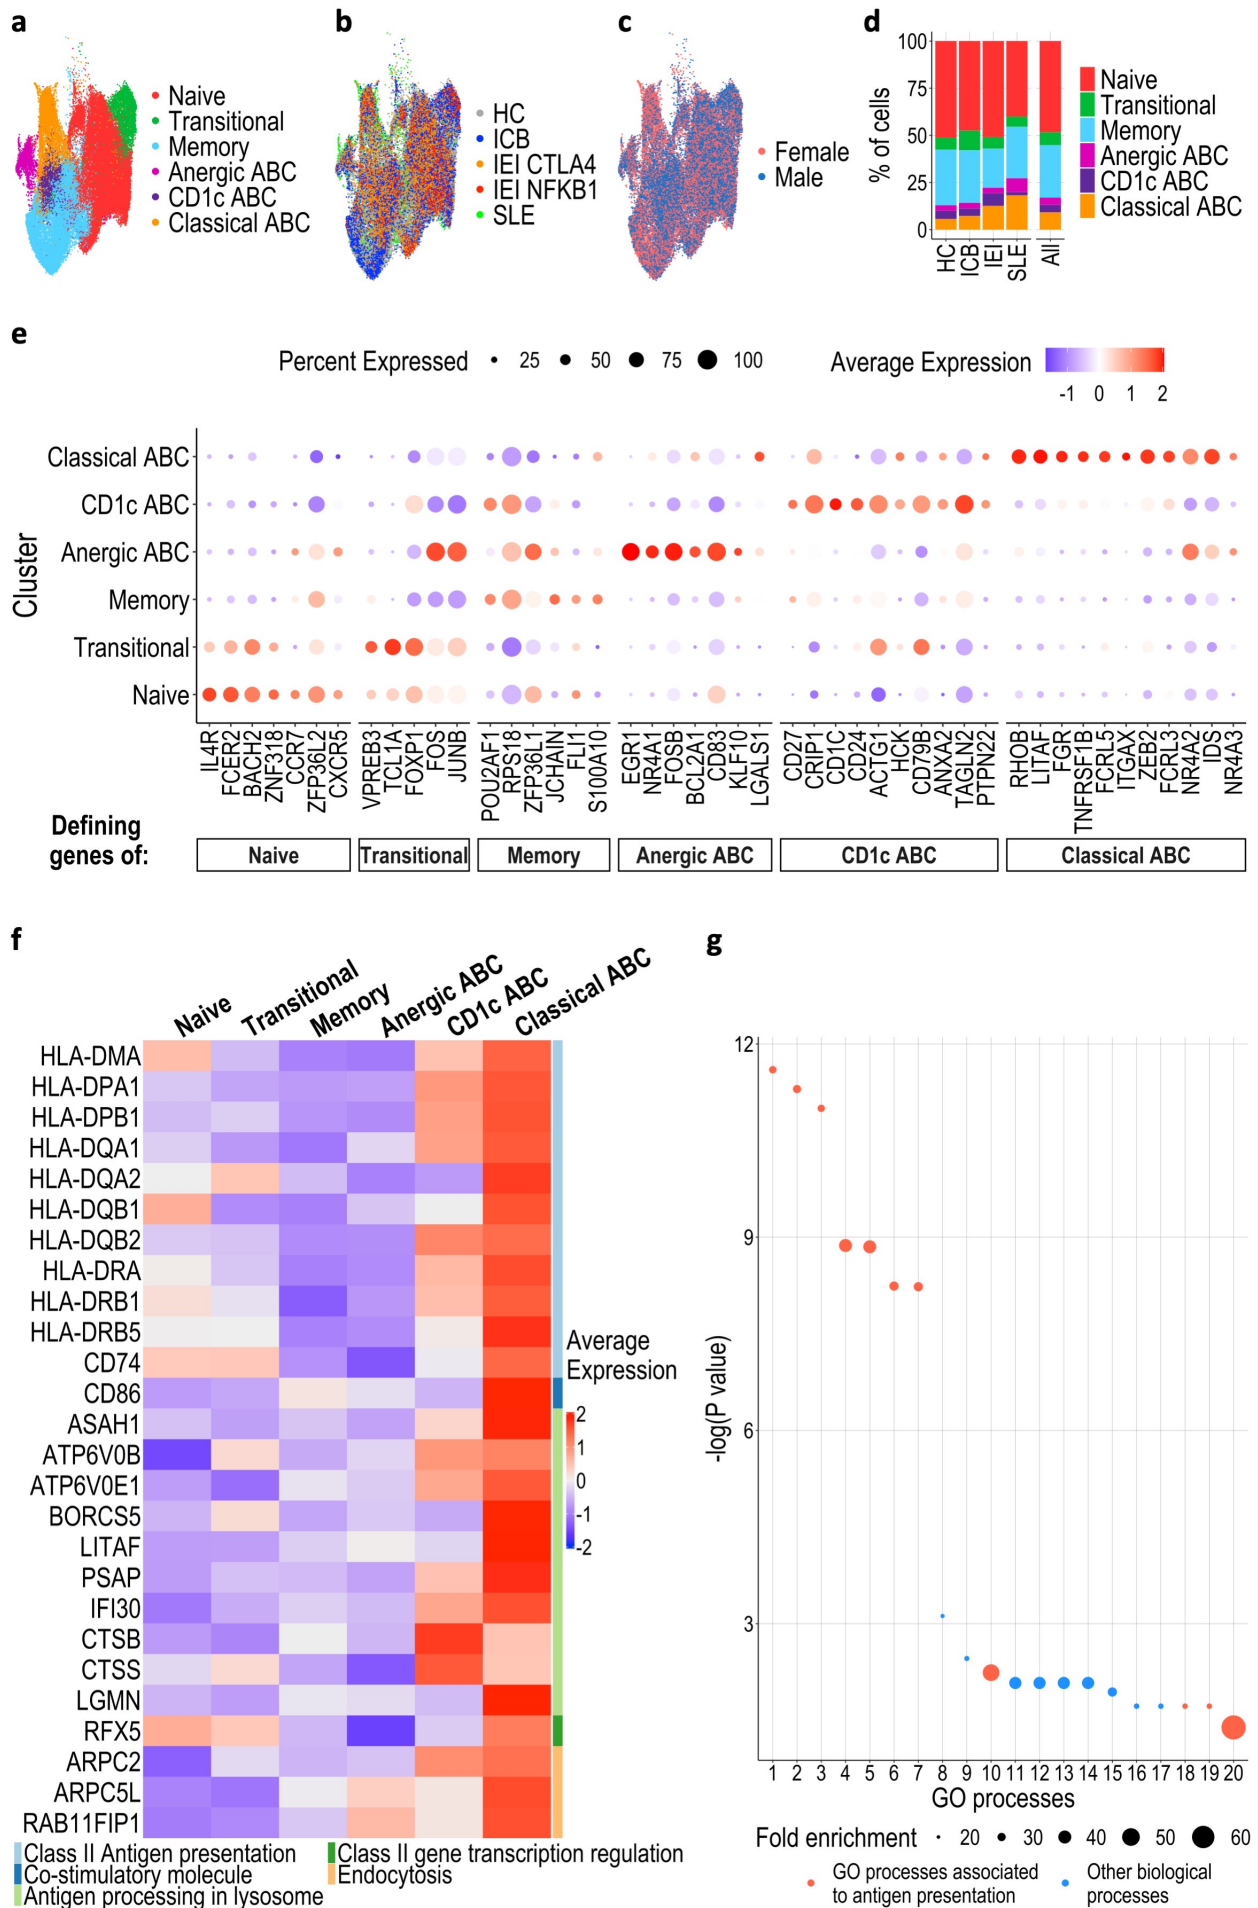

## Supplementary Figure 1

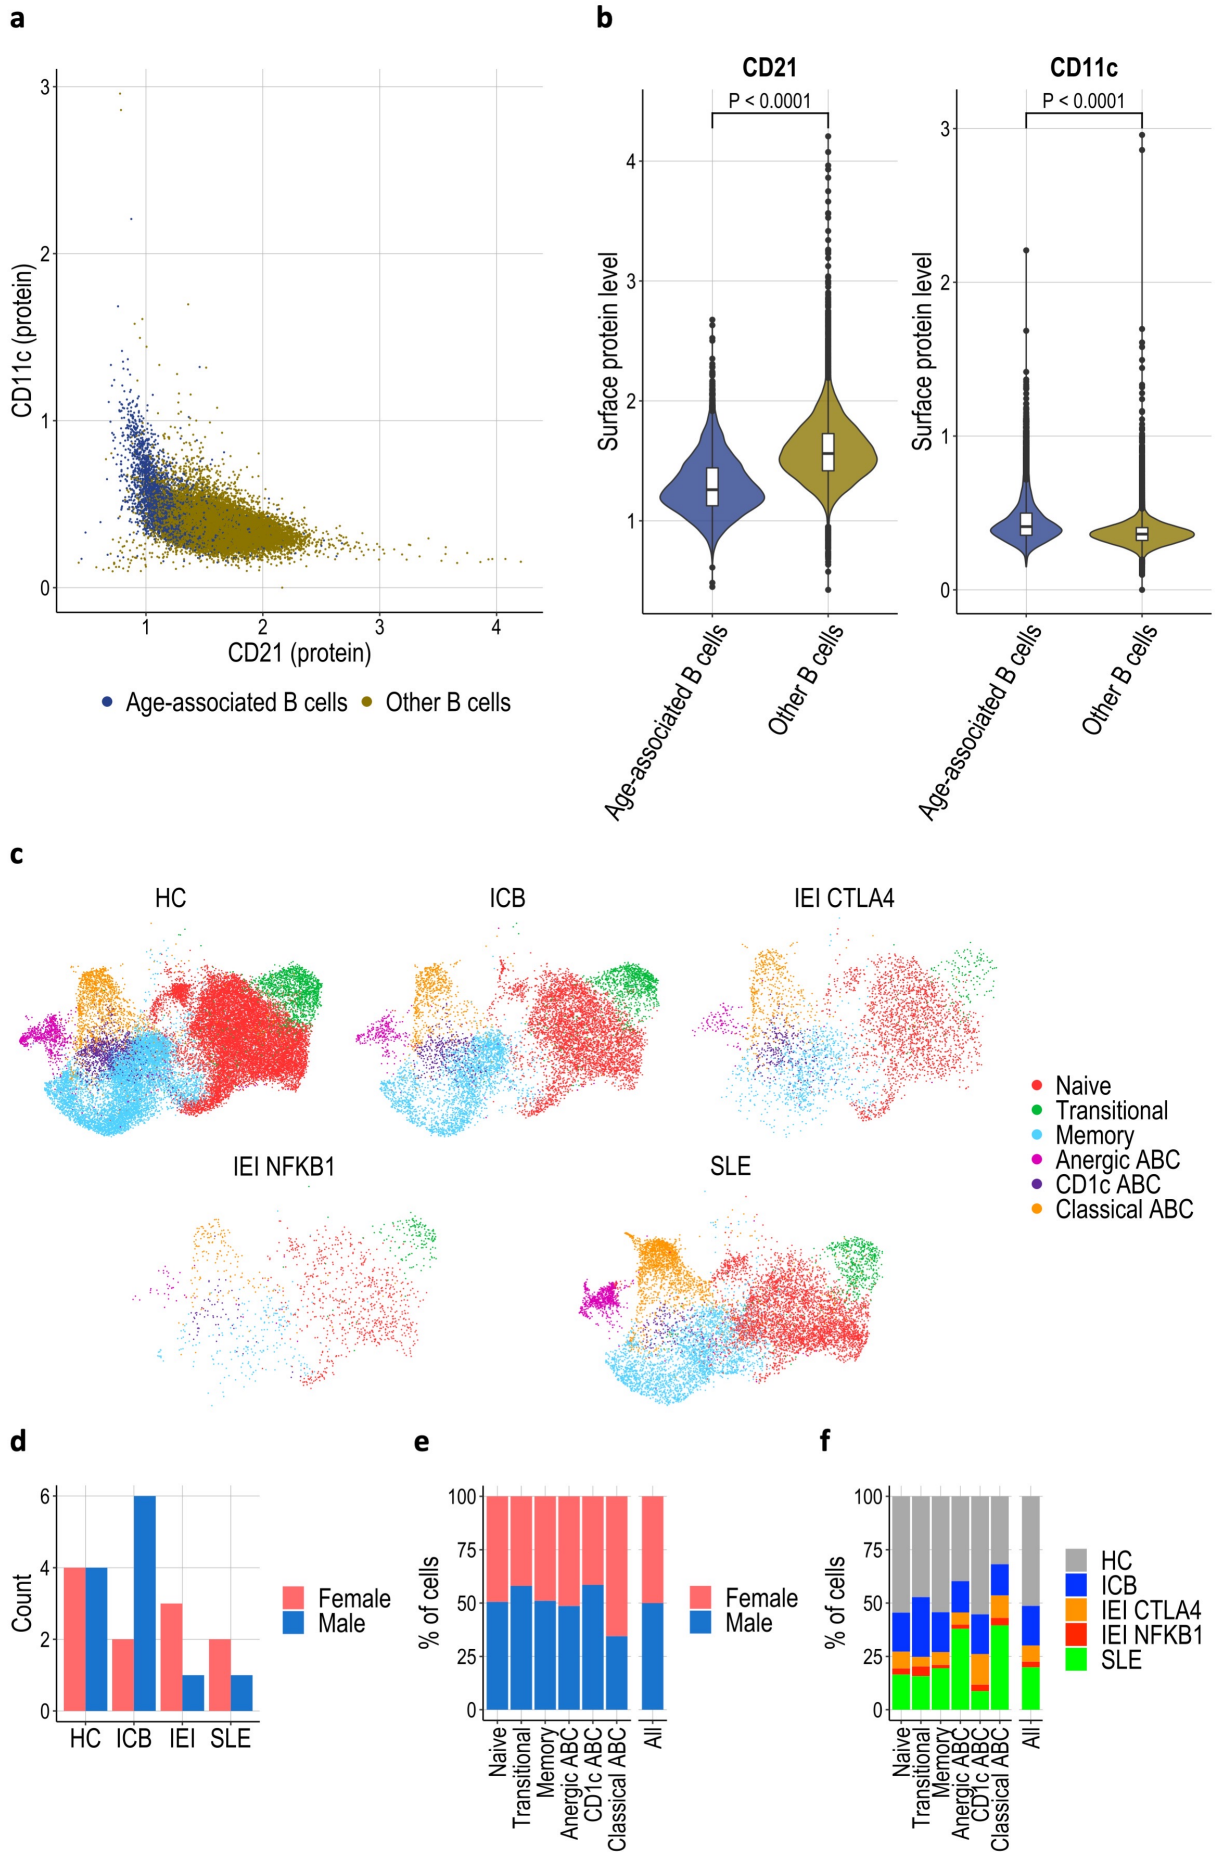

## Supplementary Figure 2

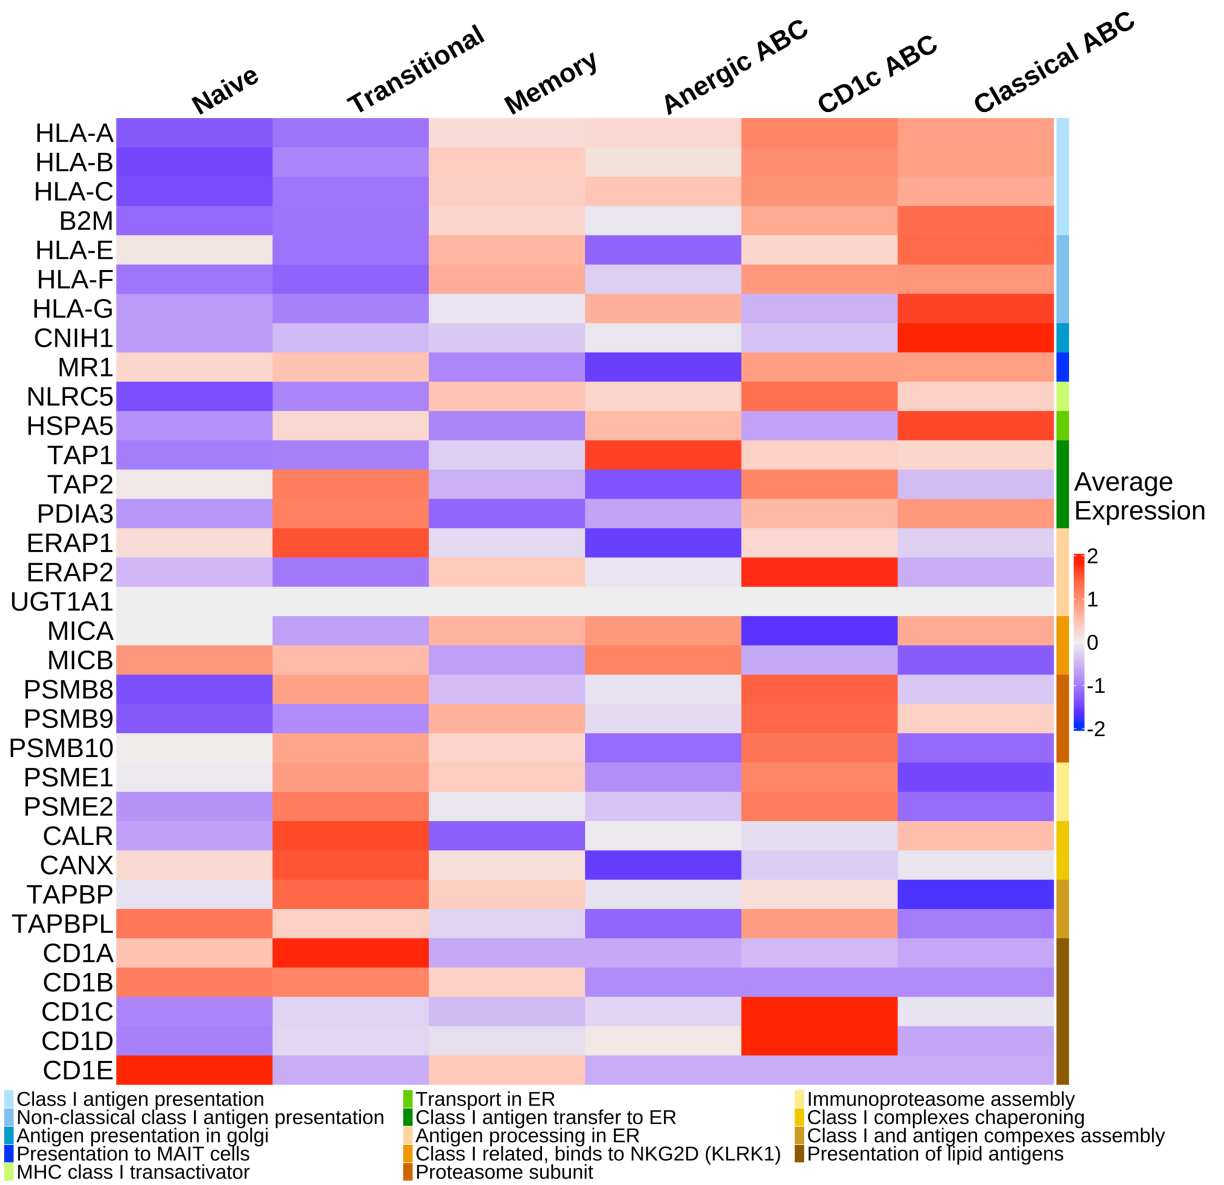

**Figure 2**

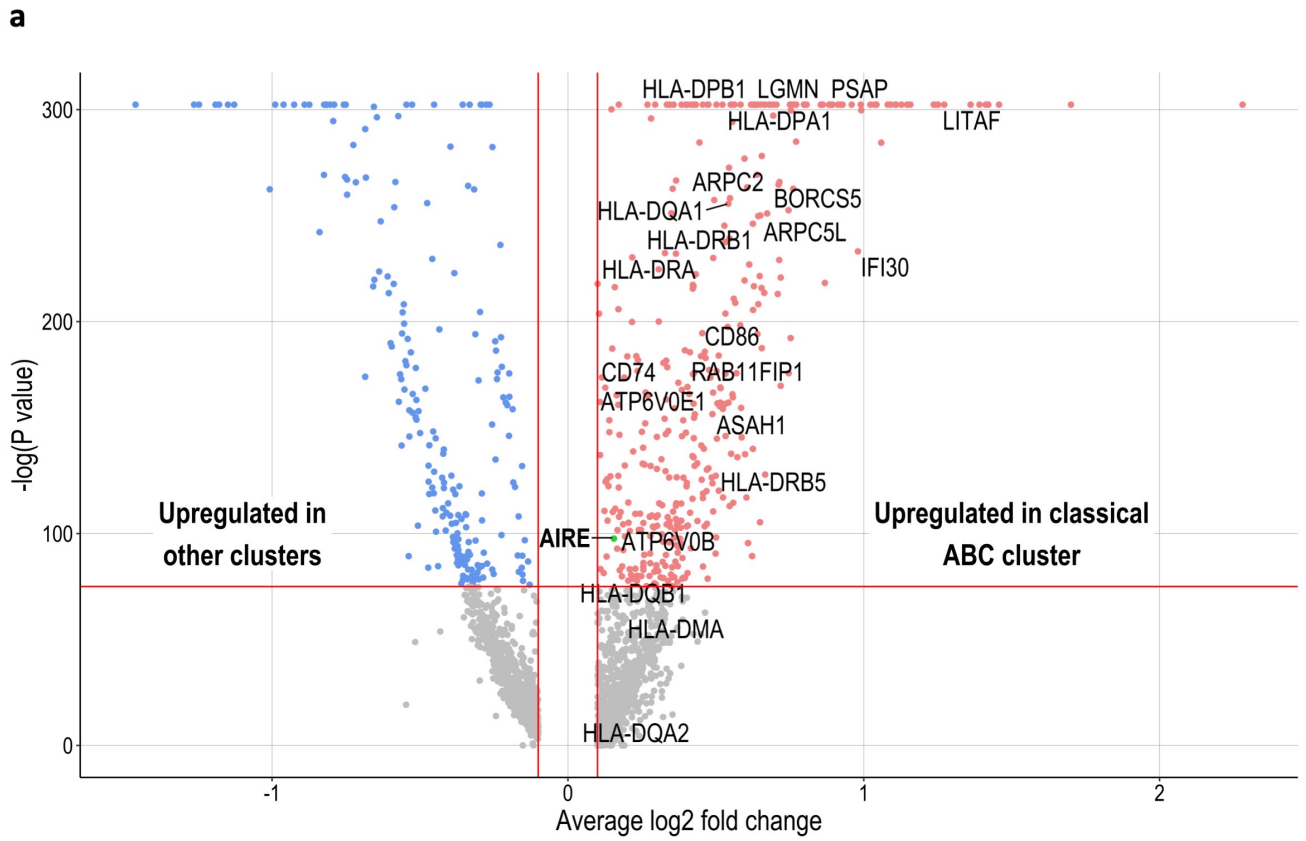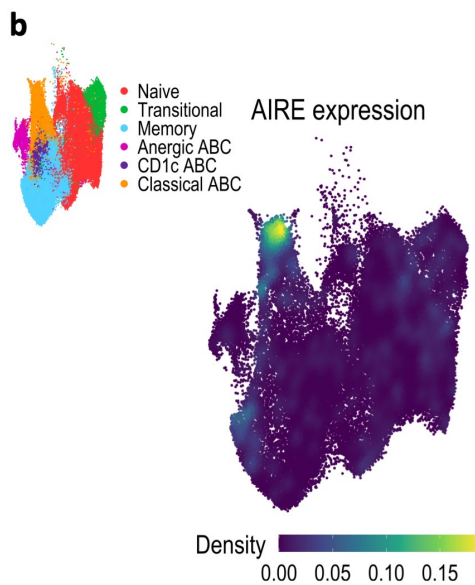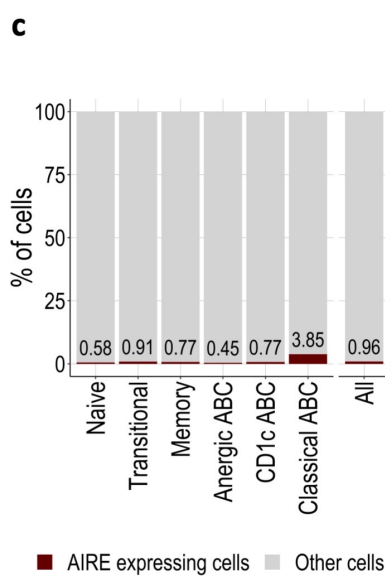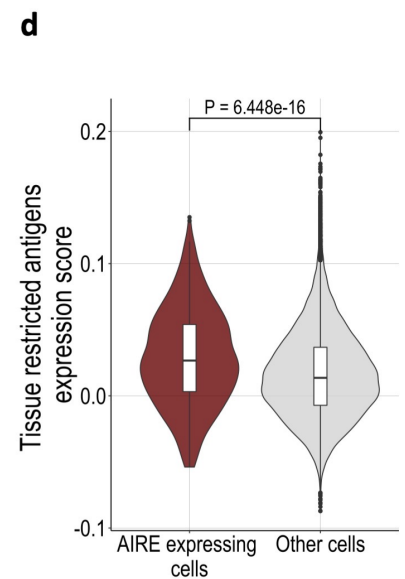

### Supplementary Figure 3

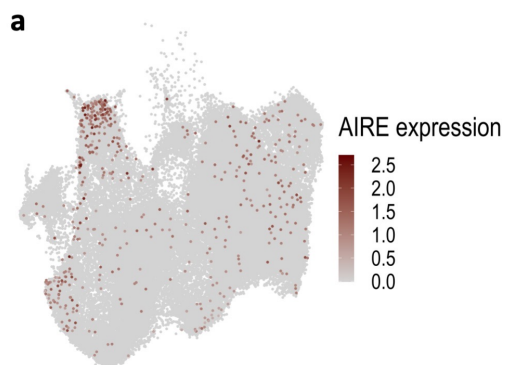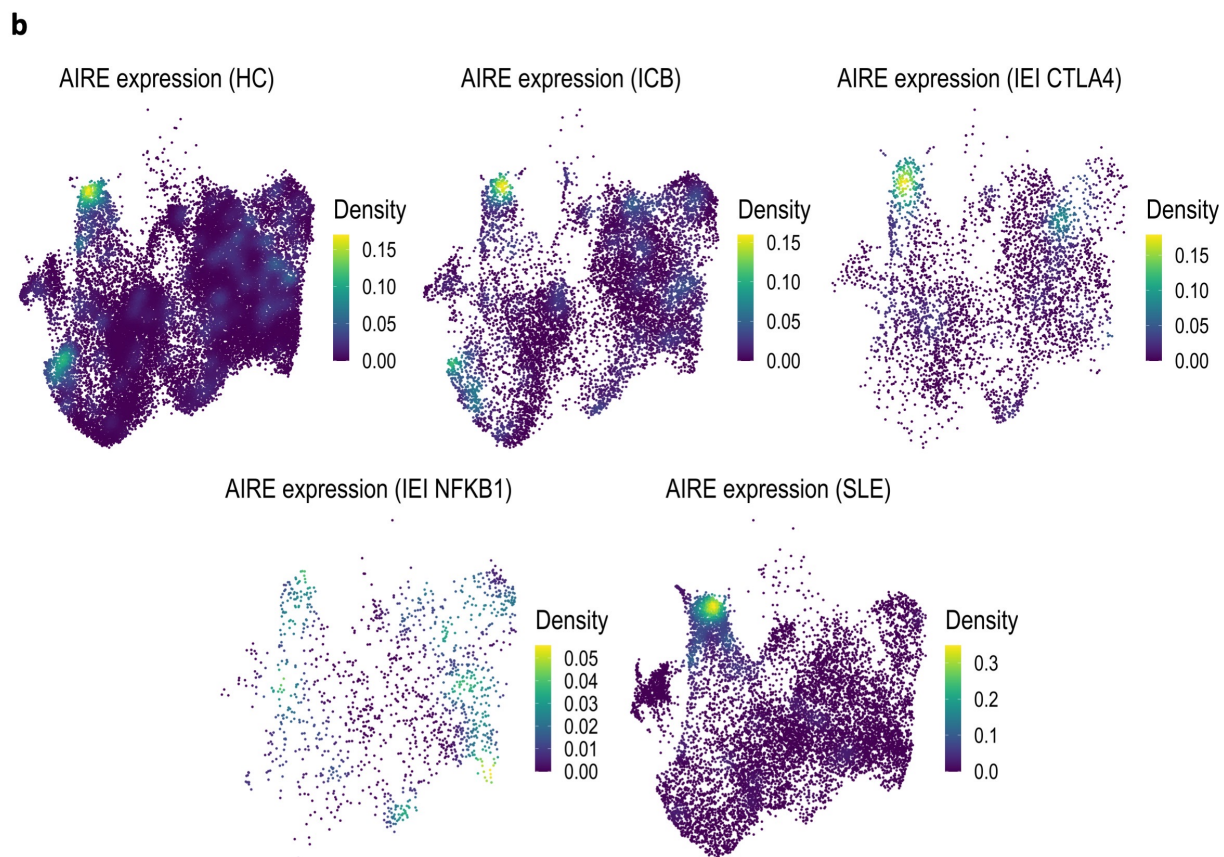



**Figure 3**

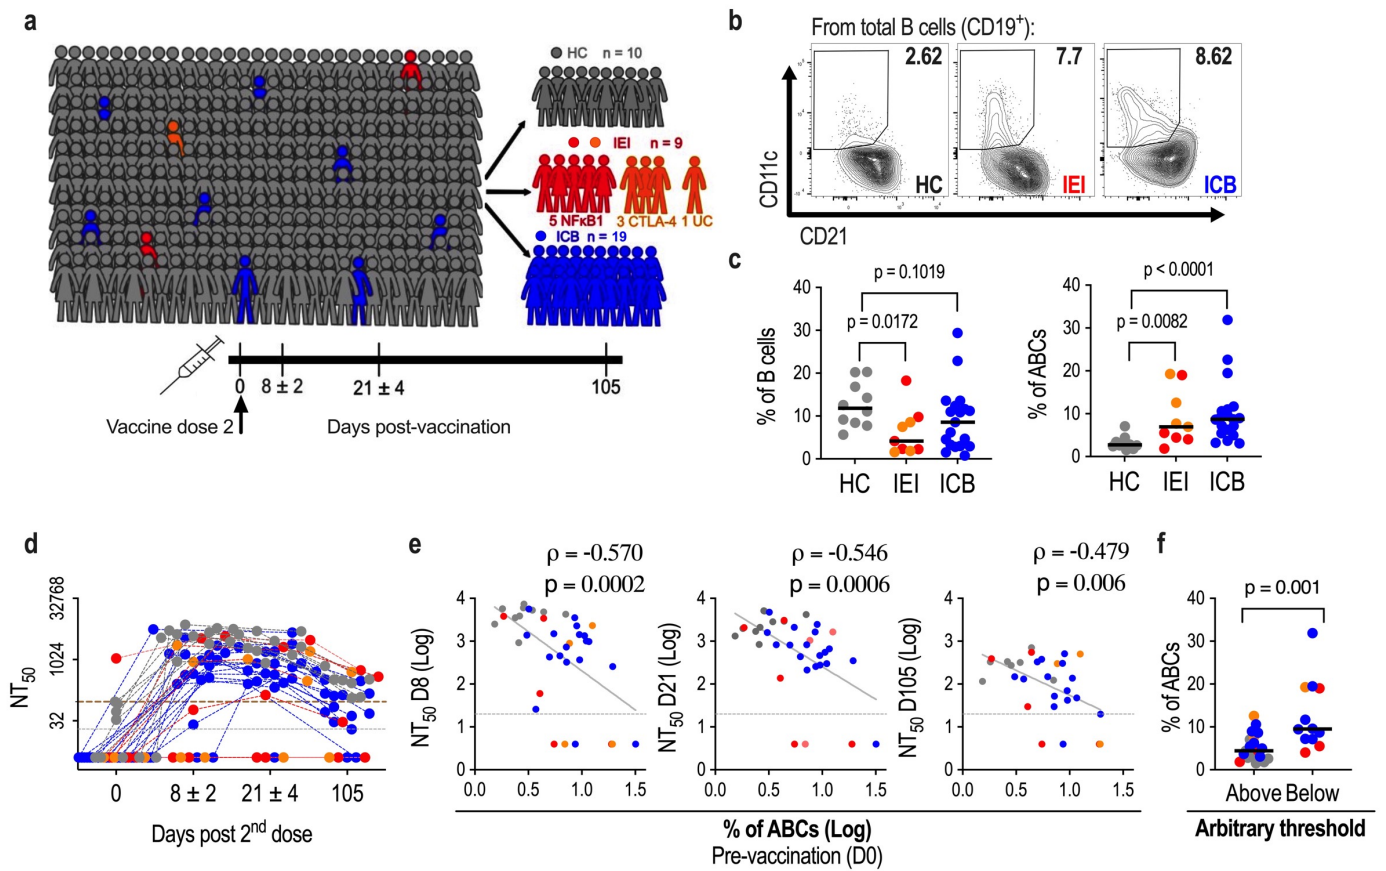

## Supplementary Figure 4

**a**

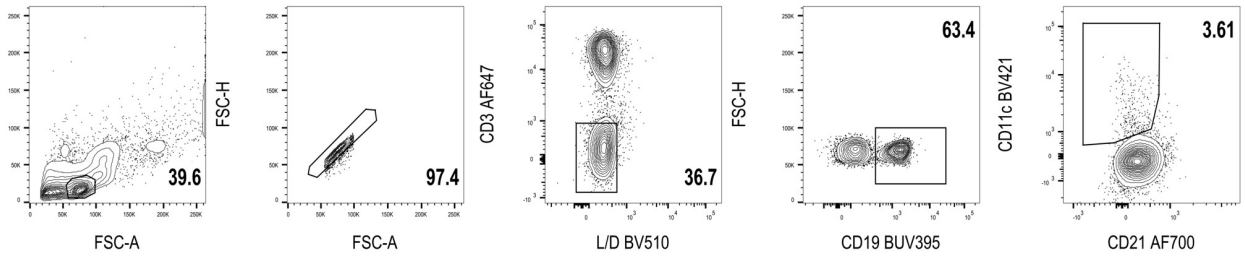

**b**

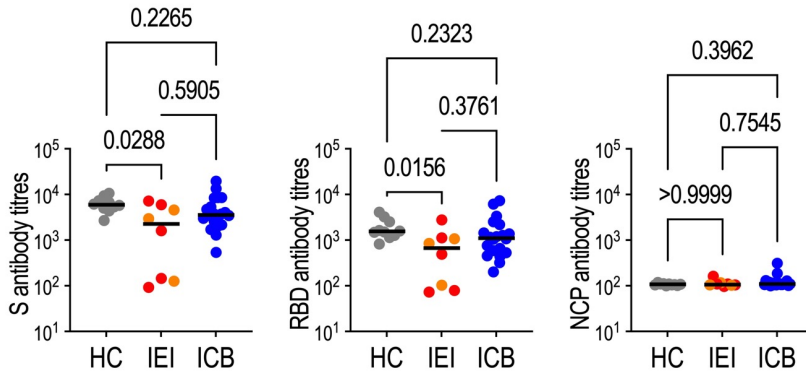

**c**

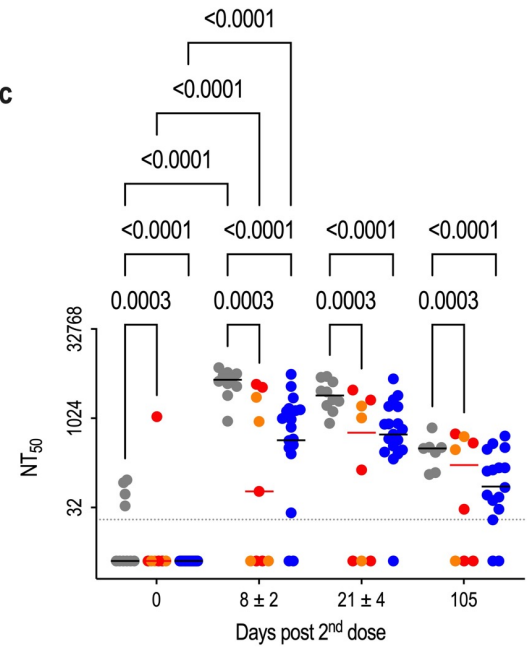

**Figure 4**

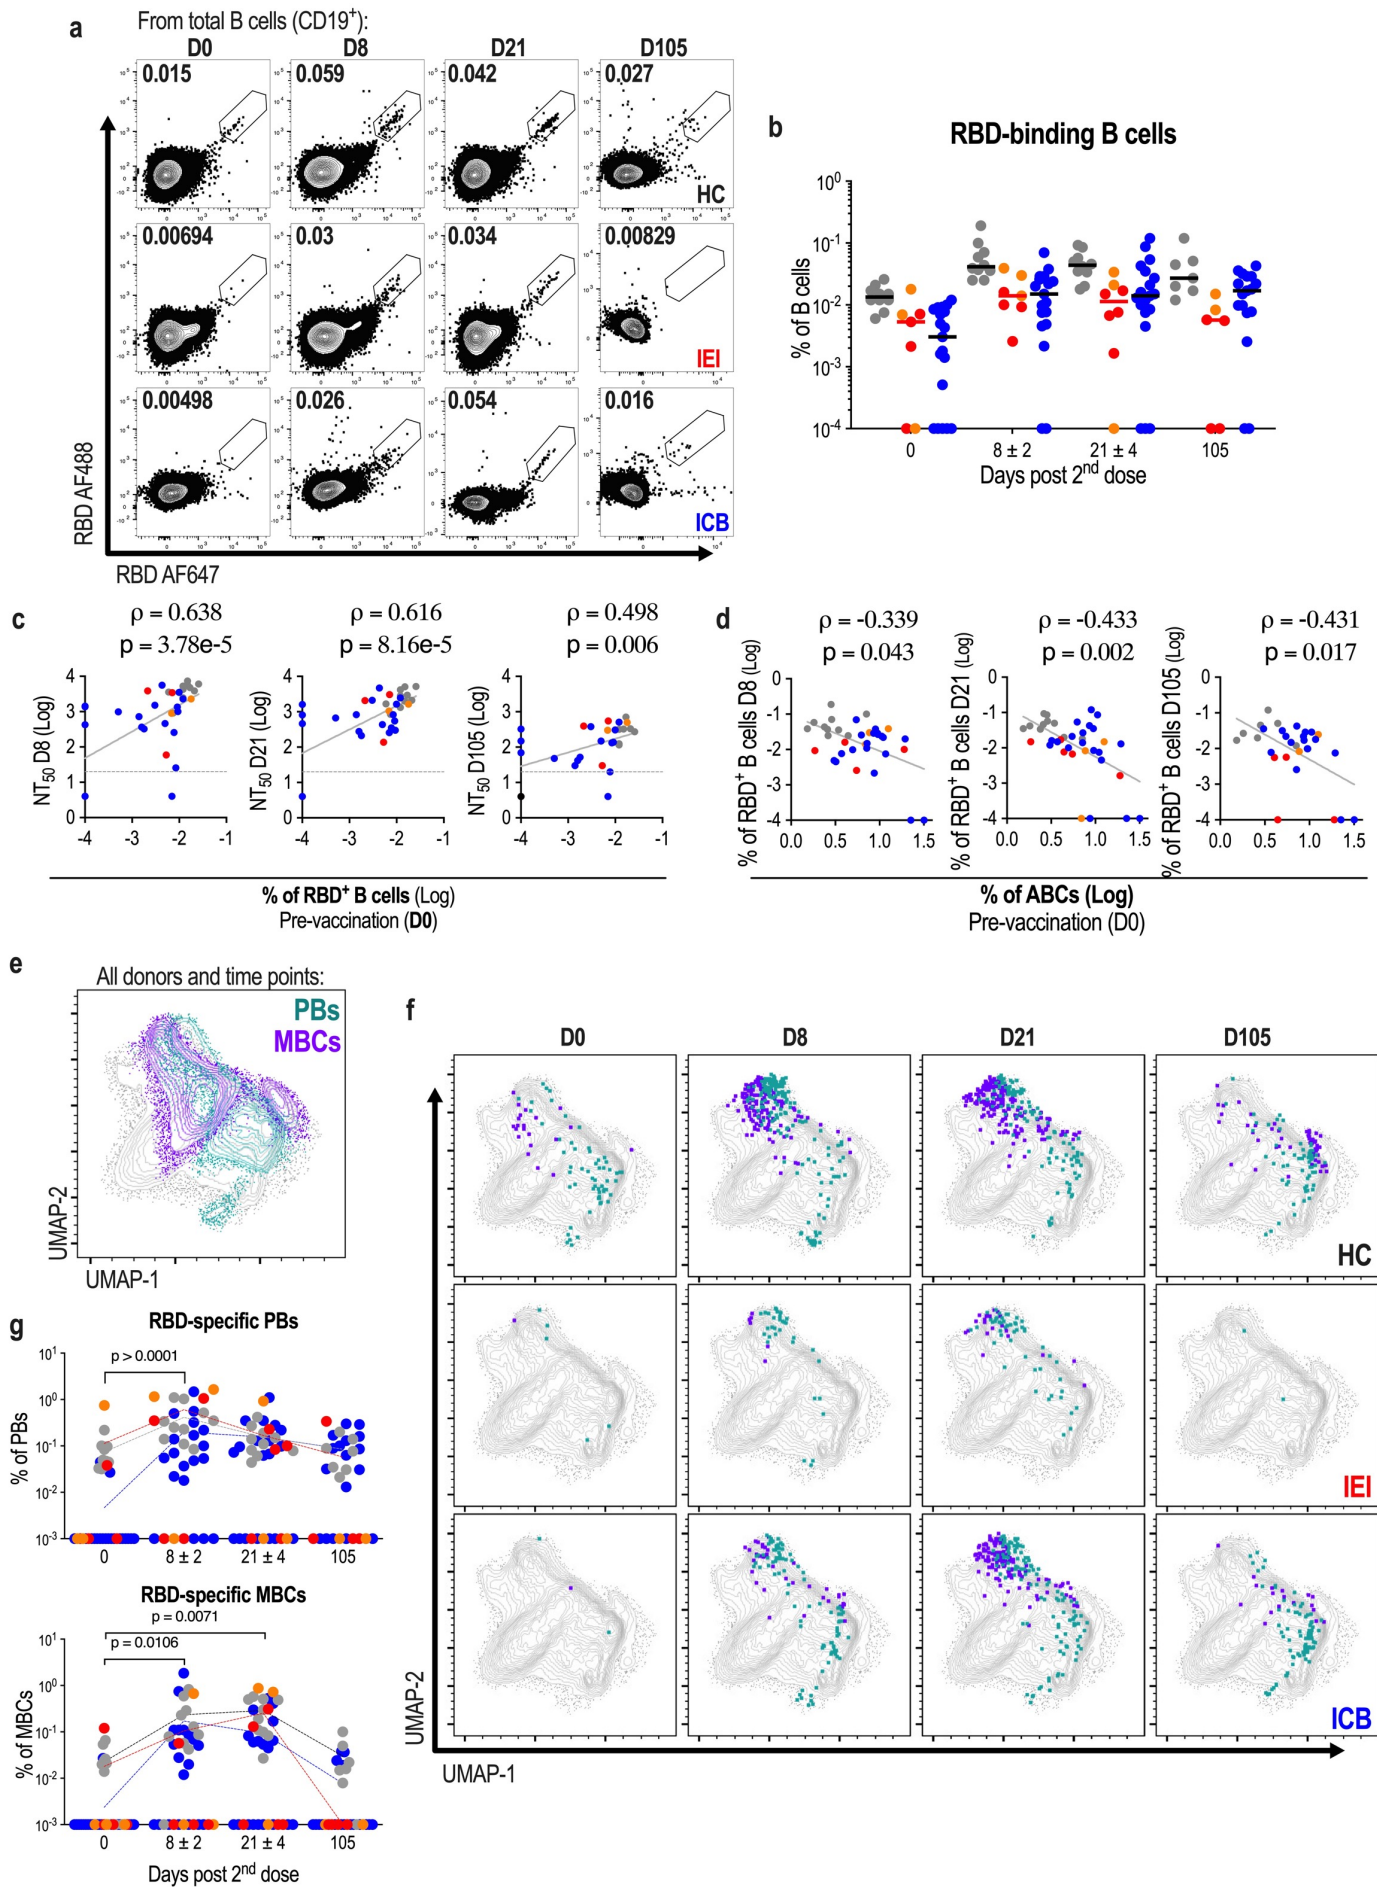

## Supplementary Figure 5

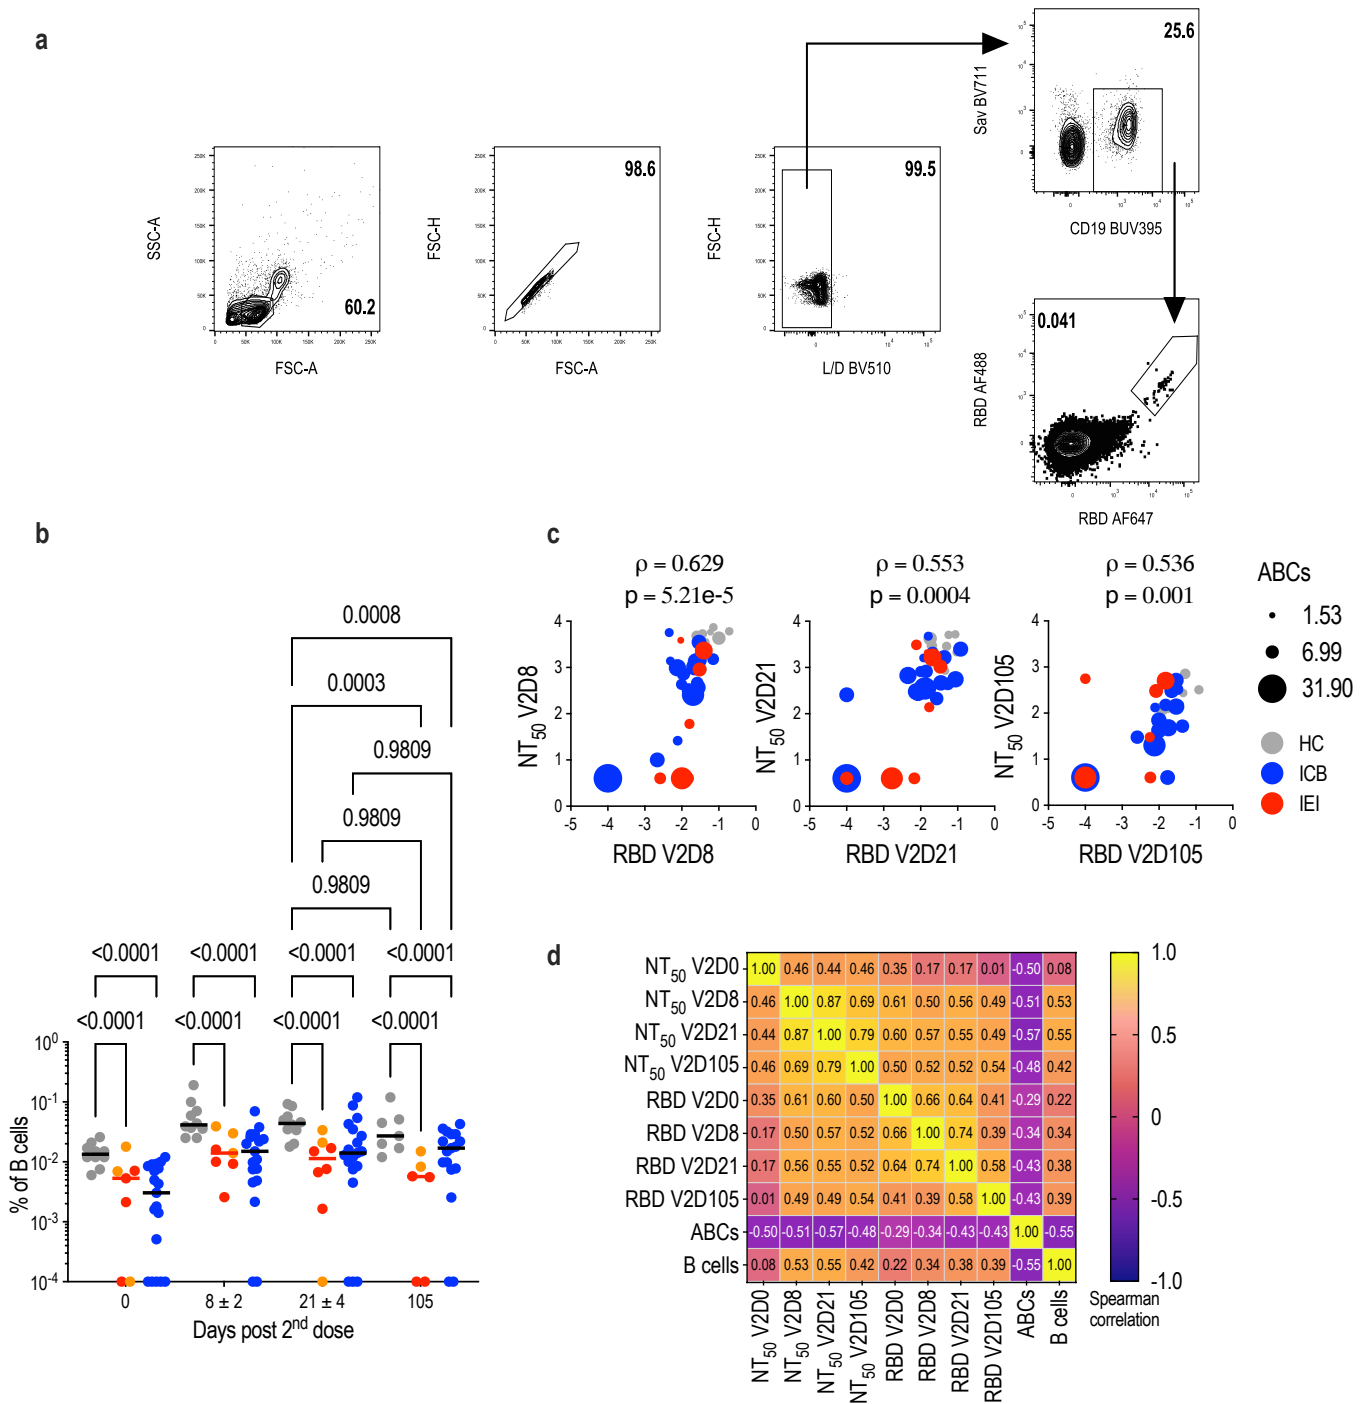

Source: https://medrxiv.org/content/10.1101/2022.09.17.22280033v1.full.pdf
